# Physiology and ecology combine to determine host and vector importance for Ross River virus and other vector-borne diseases

Morgan P. Kain<sup>1,2\*</sup>, Eloise Skinner<sup>1\*</sup>, Andrew F. van den Hurk<sup>3</sup>,  
Hamish McCallum<sup>4</sup>, Erin A. Mordecai<sup>1</sup>

January 28, 2021

\*Denotes equal authorship. Corresponding authors: morganpkain@gmail.com (alt: kainm@stanford.edu), ebskinn@stanford.edu

<sup>1</sup>Department of Biology, Stanford University, Stanford, CA, 94305, USA

<sup>2</sup>Natural Capital Project, Woods Institute for the Environment, Stanford University, Stanford, CA 94305, USA

<sup>3</sup>Public Health Virology, Forensic and Scientific Services, Department of Health, Brisbane, Queensland, Australia

<sup>4</sup>School of Environment, Griffith University, Nathan, Queensland 4111, Australia

## 1 Abstract

2 Identifying the key vector and host species driving transmission is notoriously difficult for vector-borne  
3 zoonoses, but critical for disease control. Here, we present a general approach for quantifying the role hosts  
4 and vectors play in transmission that integrates species' physiological competence with their ecological  
5 traits. We apply this model to the medically important arbovirus Ross River virus (RRV), in Brisbane, Aus-  
6 tralia. We find that vertebrate species with high physiological competence weren't the most important for  
7 community transmission. Instead we estimate that humans (previously overlooked as epidemiologically  
8 important hosts) are important spreaders of RRV, in part because they attract highly competent vectors.  
9 By contrast, vectors with high physiological competence were also important for community transmission.  
10 Finally, we uncovered two distinct but overlapping transmission cycles: an enzootic cycle involving birds  
11 and *Coquillettidia linealis* and an urban cycle involving humans and *Aedes vigilax*. Broadly, this approach can  
12 be applied to other zoonoses.

## 13 Introduction

14 Understanding the complex transmission ecology of multi-host pathogens is one of the major challenges  
15 to biomedical science in the 21st century (Woolhouse et al., 2001, Borlase et al., 2018). Given that more  
16 than 60% of existing infectious diseases of humans are multi-host pathogens (i.e., moving between non-  
17 human and human populations) and that 75% of emerging and re-emerging infectious diseases affecting  
18 humans have a non-human origin (Taylor et al., 2001, van Doorn, 2014), it is critical to identify the role that  
19 different vertebrate host and vector species play in maintaining transmission and facilitating spillover into  
20 humans. The medical importance and complex transmission of zoonotic arboviruses (viruses transmitted  
21 by biting arthropods) has given rise to a large body of research that seeks to identify reservoir hosts (see  
22 Kuno et al., 2017) and arthropod vectors (e.g., Andreadis et al., 2004, Sharma and Singh, 2008, Carlson et al.,  
23 2015, Ayres, 2016) involved in transmission. Yet, not all species that become infectious contribute equally  
24 to transmission; thus, efforts must be made to identify key reservoir hosts (species that sustain parasite  
25 transmission and potentially serve as a source of infection for humans) and vectors and to quantify their  
26 relative importance for community transmission.

27 For viruses with non-human reservoir hosts, a minimum of three populations are required for spillover  
28 transmission to humans: a haematophagous arthropod vector species, a non-human vertebrate host species,  
29 and humans. Beginning with an infected vertebrate host, the transmission cycle of a zoonotic arbovirus  
30 starts when an arthropod acquires the virus whilst blood feeding on this infectious vertebrate. That vector  
31 must then survive long enough for the virus to replicate, disseminate, and infect the salivary glands be-  
32 fore the vector bites either a susceptible non-human host (to continue the zoonotic transmission cycle) or a  
33 susceptible human (for spillover transmission). However, the transmission of numerous arboviruses (e.g.,  
34 Ross River virus, West Nile virus) involves many reservoir host and vector species that vary in both physio-  
35 logical ability to propagate infection and in ecology and behavior, the latter of which can determine contact  
36 patterns among species. Further, zoonotic arboviruses may have several transmission cycles. For example,  
37 in South America, yellow fever virus (YFV) is maintained in non-human primate enzootic cycles involving  
38 non-*Aedes* mosquitoes such as *Sabethes sp.* and *Haemagogus sp.* (de Camargo-Neves et al., 2005, Childs et al.,  
39 2019), but can spillover into humans from *Aedes* mosquitoes (Kaul et al., 2018, Childs et al., 2019, de Almeida  
40 et al., 2019), and once in humans has the potential to cause epidemics through human-to-human transmis-  
41 sion via *Aedes* mosquitoes (Lee and Moore, 1972, Nasidi et al., 1989, Murphy, 2014). Thus, the data required  
42 to characterize transmission includes numerous species and spans biological niches, scales and disciplines,  
43 and depends on which species is being targeted.

44 Previous work has proposed a wide variety of definitions and techniques for quantifying the importance

45 of vector and host species involved in zoonotic disease transmission (Table S1). Despite much variation,  
46 there is consensus that for a species to be either a vector or a vertebrate host, it must have the physiological  
47 capability to transmit a pathogen as well as ecological and behavioral characteristics that support ongoing  
48 transmission (though the characteristics highlighted vary by study; see Table S1). A host species' physio-  
49 logical competence, measured through experimental infection studies, is defined as its ability to develop  
50 viremia of sufficient titer and duration to infect blood feeding arthropods (Tabachnick, 2013, Martin et al.,  
51 2016). A vector species' physiological competence, commonly referred to simply as vector competence, is  
52 the ability of an arthropod to become infected with and transmit the virus to a susceptible vertebrate host  
53 (Kuno et al., 2017). Although physiological competence alone has been used to incriminate vertebrate host  
54 and vector species (e.g., Komar et al., 2003, Keesing et al., 2012, Huang et al., 2013), the contribution specific  
55 host or vector species make to arboviral transmission under natural conditions additionally depends on  
56 interactions between these two groups. For example, vertebrate species differ in their relative availability  
57 and attractiveness to different vectors, which can cause two host species with similar viremic responses to  
58 infect different numbers of mosquitoes that may also differ in competence.

59 Several studies have sought to measure the relative importance of vectors and hosts for a variety of  
60 pathogens by combining physiological competence with species interactions within ecological communi-  
61 ties (e.g., West Nile virus: Kilpatrick et al. 2006, Kain and Bolker 2019, Ross River Virus: Koolhof and Carver  
62 2017, Stephenson et al. 2018, avian malaria: Ferraguti et al. 2020, leishmaniasis: Stephens et al. 2016, Chagas  
63 disease: Gürtler and Cardinal 2015, Jansen et al. 2018). However, because these studies are highly specific,  
64 and adopt different methods and definitions from previous work, it is difficult to compare results between  
65 studies. Further, quantifying species' relative importance as these studies do is not yet standard; it is still  
66 common for studies to simply identify hosts and vectors involved in transmission and not to rank them in  
67 importance. To synthesize the role of physiological, ecological, and behavioral traits in driving transmission  
68 of multi-host, multi-vector pathogens, we propose using a model that: 1) focuses on ranking the relative  
69 importance of each species involved in community transmission instead of solely identifying species in-  
70 volved in transmission; 2) quantifies which of the many interacting physiological and ecological processes  
71 have the largest control over each species' rank; and 3) identifies where the largest sources of uncertainty  
72 lie in order to identify which datasets require collection for better predictions (Restif et al., 2012). Specif-  
73 ically, we suggest characterizing the role a particular species plays in transmission by considering three  
74 nested metrics of increasing biological complexity: physiological competence, half-cycle transmission (i.e.,  
75 host-to-vector or vector-to-host transmission), and complete-cycle transmission (i.e., host-to-vector-to-host  
76 or vector-to-host-to-vector transmission) (Figure 1). This strategy provides a general approach that can be  
77 used across systems to combine multidisciplinary data and compare species' transmission ability, and does

78 so by embracing and building upon definitions that have been used for decades (e.g., laboratory-derived  
79 “competence” as measured separately from field-based metrics).

80 For host physiological competence we consider a host’s viremic response to infection (magnitude and  
81 duration of titer), as well as the proportion of individuals that develop a viremic response when exposed.  
82 For vectors we consider the proportion of individuals that get infected following exposure to a given dose  
83 and eventually become infectious whereby they transmit the virus in their saliva (Figure 1). Using half-  
84 cycle transmission we rank species according to the number of new vector infections a host produces or  
85 new host infections a vector produces in a community, which is additionally dependent on the ecological  
86 factors that modulate host-vector contact rates (Figure 1). This approach, which combines the physiological  
87 competence of both vectors and hosts with ecological variables such as contact rate and species abundance,  
88 has successfully identified important reservoir hosts in communities with high species heterogeneity (Kil-  
89 patrick et al., 2006). Yet, despite the addition of this ecological data, the host-to-vector or vector-to-host  
90 approach still only captures half of the pathogen’s transmission cycle, because it does not account for the  
91 next generation of infections in the community, and thus remains a step removed from elucidating how  
92 infection propagates more broadly.

93 Across a complete arboviral transmission cycle, a host species can be quantified as having a higher level  
94 of importance than another if it infects a larger number of other hosts, and similarly for vectors infecting  
95 other vectors. This metric is particularly important because it “closes the loop” by estimating the number of  
96 new infections in the next generation, which is needed to calculate  $\mathcal{R}_0$ , the number of new infections arising  
97 from a single case in an otherwise susceptible population. Considering the full transmission cycle by rank-  
98 ing host and vector competence can help to disentangle multiple routes of transmission (e.g., enzootic vs.  
99 human-epidemic—active transmission between humans) by identifying, for example, which hosts maintain  
100 infection in non-human vertebrate populations, or ultimately lead to the most human infections. Further,  
101 complete-cycle transmission can be used to simulate how infection cascades in a community across multi-  
102 ple generations, which is important for identifying which hosts or vectors distribute infections broadly in  
103 the community over time. Though this approach provides the most complete picture of transmission, and  
104 offers a more accurate account of species importance, it is adopted less frequently for identifying host and  
105 vector species important in multi-host, multi-vector systems. This is likely because of the need for data  
106 across each transmission phase for multiple host and vector species, which is often not available. Nonethe-  
107 less, even for systems with limited data, a model that integrates the entire transmission cycle can be useful  
108 for hypothesis testing and for guiding data collection by identifying the processes that most contribute to  
109 uncertainty in competence rankings (i.e., model-guided fieldwork, sensu Restif et al., 2012).

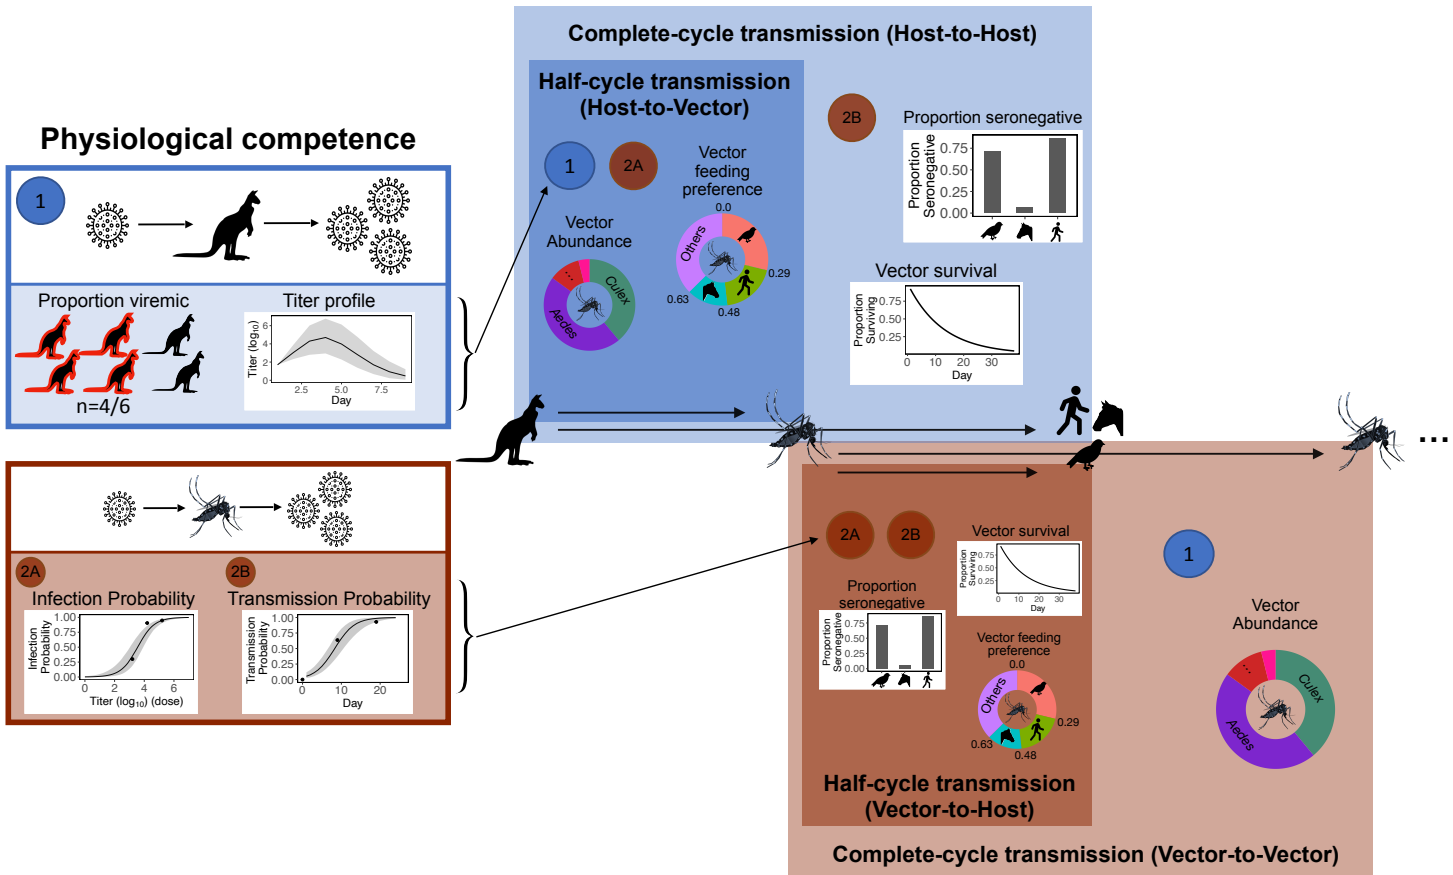

Figure 1: The transmission cycle of a multi-host, multi-vector arbovirus, partitioned into our three nested metrics of transmission: physiological competence, half-cycle, and complete-cycle transmission). The first requirements for transmission are physiologically competent hosts that are able to replicate the virus to suitable levels to infect vectors (host physiological competence) and vector species that can become infected and eventually are able to transmit virus (vector physiological competence) (left boxes). Physiologically competent hosts and vectors contribute to the transmission of the virus through a continuous cycle of transmission (right boxes), which can be viewed from two perspectives, either starting with an infected host or starting with an infected vector; regardless of perspective, a single complete cycle (host-to-host: light blue shaded box or vector-to-vector: light orange shaded box) contains a single set of physiological and ecological components. Starting with an infected host, the first transmission step (host-to-vector transmission; dark blue shaded box) combines host physiological competence with vector infection probability (2A), vector abundance, and vector feeding preferences. Complete-cycle transmission starting with a single infected host (light blue shaded box) combines host-to-vector transmission with vector-to-host transmission, and thus further includes vector transmission probability (2B), the proportion of hosts that are susceptible (i.e., seronegative), and vector survival. Viewing the transmission cycle from the perspective of a mosquito, starting with vector-to-host transmission, combines vector physiological competence with vector feeding preference, the proportion of susceptible hosts that are seronegative, and vector survival. Complete-cycle transmission starting with a single infected vector (light orange shaded box) combines vector-to-host transmission with host-to-vector transmission, which requires the inclusion of host physiological competence (1) and vector abundance.

110 Here, we apply our hierarchical approach for estimating the importance of different vertebrates hosts  
 111 and mosquito species in transmission of Ross River virus (RRV) in the city of Brisbane, Australia, an en-  
 112 demic location where data exists for nearly all components of our transmission model. RRV is an alphavirus  
 113 that causes a disease syndrome characterized by polyarthrits, and which is responsible for the greatest

114 number of mosquito-borne human disease notifications in Australia, with approximately 5,000 cases noti-  
115 fied annually ([Australian Govt. Dept. of Health, 2020](#)). It has also caused major epidemics in Pacific Islands  
116 involving 10,000s of cases ([Aaskov et al., 1981](#), [Tesh et al., 1981](#), [Harley et al., 2001](#)), and is considered a  
117 potentially emerging arbovirus ([Flies et al., 2018](#), [Shanks, 2019](#)). Understanding the drivers of epidemic  
118 and endemic transmission of RRV in Australia and Pacific Island countries has remained challenging be-  
119 cause of the number of hosts and mosquitoes that potentially become infected and large uncertainty around  
120 which of these vectors and hosts contribute most to transmission. Under controlled laboratory conditions,  
121 more than 30 species of mosquitoes representing at least five genera have demonstrated the physiological  
122 ability to transmit RRV. RRV has long been considered to exist in a zoonotic transmission cycle, primarily  
123 because the number of human cases during winter months was considered to be too low to sustain commu-  
124 nity transmission ([Harley et al., 2001](#)). The vertebrate hosts of RRV, however, are highly ambiguous, with  
125 more than 50 species demonstrating natural exposure to RRV, as evidenced by the presence of antibodies  
126 (reviewed in [Stephenson et al., 2018](#)). However, much uncertainty remains as to which vertebrate species  
127 contribute to RRV community transmission and how the importance of these species in transmission varies  
128 by locations (such as urban vs. rural settings, or in Australia vs. the Pacific Islands, where there are differ-  
129 ent vertebrate communities). Though insights have previously been gained through modelling approaches  
130 ([Carver et al., 2009](#), [Denholm et al., 2017](#), [Koolhof and Carver, 2017](#)), these studies note that future progress  
131 in RRV modelling requires consideration of the dynamics of multiple mosquito species and multiple hosts,  
132 accounting for their differing availability, and their differing physiological capability to transmit RRV.

133 We parameterize our model for RRV to quantify the relative importance of hosts and vectors for disease  
134 transmission and to illustrate how the relative importance of these species changes depending on what  
135 metric is used. Specifically, we ask the following questions for RRV transmission in Brisbane:

- 136 1. Which host and vector species are most physiologically competent for transmitting RRV?
- 137 2. How does integrating species ecology change the most important hosts and vectors when considering  
138 a half (host-to-vector or vector-to-host) or full (host-to-host or vector-to-vector) transmission cycle?
- 139 3. How do viruses circulate through different species in the community, e.g., which hosts and vectors  
140 contribute to intra- and inter-species transmission?

## 141 Results

### 142 Physiological competence

#### 143 Host competence

144 Of the vertebrate species available for the analysis in Brisbane, we estimated that rats and macropods had  
 145 the strongest viremic response (highest titer and duration) to RRV infection (Figure 2A). Sheep, rabbits,  
 146 humans, and possums formed a distinct cluster of hosts with the next strongest responses, though uncer-  
 147 tainty in host titer profiles obscures our ability to assign exact ranks to all species. Of the remaining species,  
 148 'birds' (an average of *Gallus gallus domesticus*, *Cacatua sanguinea*, and *Anas superciliosa*) and flying foxes were  
 149 ranked higher than horses and cattle. No dogs or cats developed detectable viremia when exposed to RRV  
 150 experimentally (N = 10 for each species), resulting in them having the lowest competence rank. Fitted titer  
 151 profiles for all hosts that data was available for are presented in Figure S<sub>m</sub>1 (area under the curve (AUC)  
 152 for these profiles are presented in Figure S<sub>m</sub>2), whilst the proportion of the cohort of each host species that  
 153 developed a viremic response when exposed to RRV is listed in Table S2.

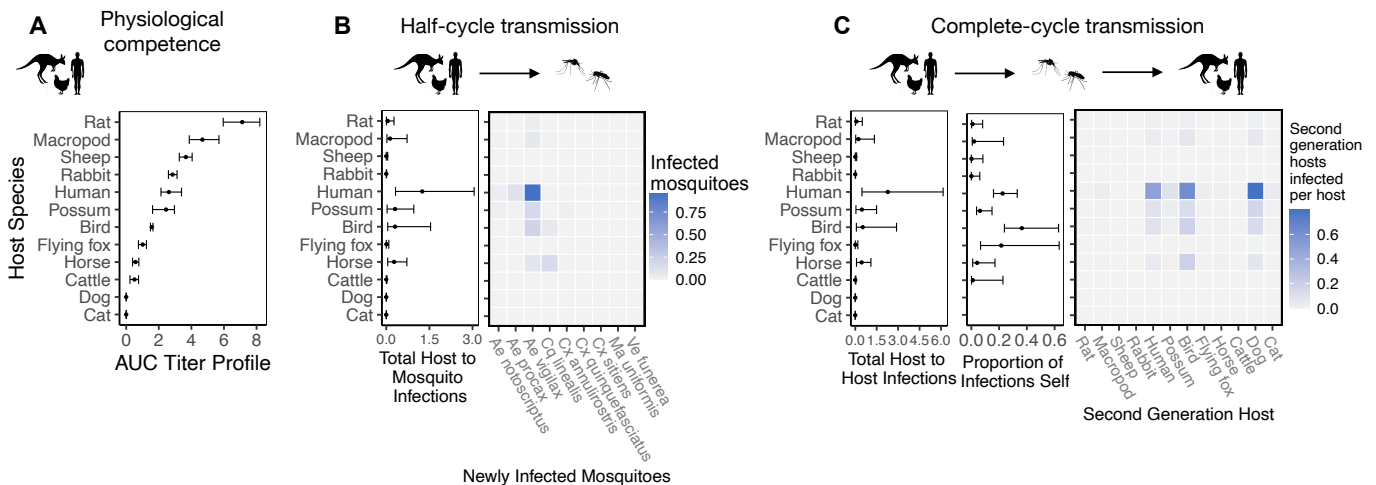

Figure 2: **Ross River virus transmission capability of Brisbane hosts based on physiological traits alone or with consideration of ecological traits that drive community transmission.** A. Physiological response of hosts to experimental infection with RRV. Hosts are ordered from highest (top) to lowest (bottom) competence by median estimate (points show medians and error bars show 95% confidence intervals). B. Transmission over one half of a transmission cycle starting with an infected host; matrices show medians for pairwise host-to-vector transmission estimates for host and vector species pairs, while the points show infection totals (sums across matrix rows) and their 95% confidence intervals (error bars). C. Transmission over a complete transmission cycle from the viewpoint of hosts (host-to-host transmission). As in Panel A, the matrices show medians for transmission estimates between species pairs, while the points and error bars show either sums across rows of the matrices (left plot) or the proportion of infections in the second generation that are in the same species as the original infected individual (center plot). Host species are presented in a consistent order across panels to aid visualization of rank-order changes among panels.

## 154 Vector competence

155 The model estimated that the mosquito species with the highest physiological potential for RRV transmis-  
 156 sion (susceptibility of mosquitoes to infection, and of those that become infected, their potential to transmit  
 157 RRV) was *Cq. linealis*, though the 95% CI for this species does overlap with four species with the next high-  
 158 est median estimate (*Ae. procax*, *Ve. funerea*, *Ae. vigilax*, and *Ma. uniformis*) (Figure 3A). In contrast, *Cx.*  
 159 *annulirostris*, *Cx. quinquefasciatus*, *Ae. notoscriptus*, and *Cx. sitiens* all ranked equally low in physiological  
 160 vector potential. For infection probability curves for all mosquito species we gathered data for, including  
 161 those in the Brisbane community and from elsewhere in Australia, refer to Figure S<sub>m</sub>3 and Figure S<sub>m</sub>4).

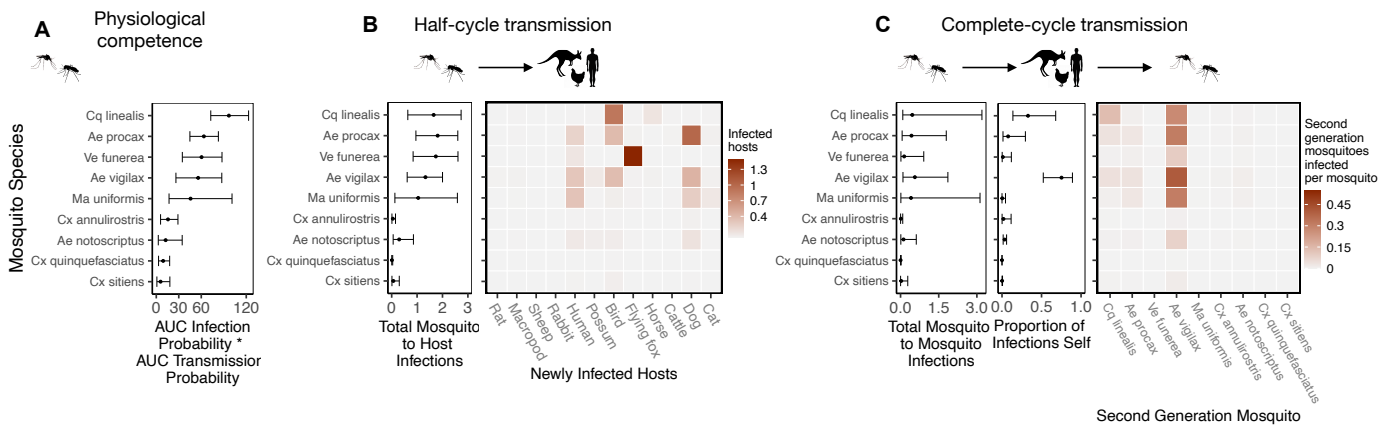

**Figure 3: Ross River virus transmission capability of Brisbane mosquitoes based on physiological traits alone or with consideration of ecological traits that drive community transmission.** A. Physiological response of mosquitoes to experimental infection with RRV. Mosquitoes are ordered from highest (top) to lowest (bottom) competence by median estimate (points show medians and error bars show 95% confidence intervals). B. Transmission over one half of a transmission cycle starting with a mosquito exposed to infection; matrices show medians for pairwise vector-to-host transmission estimates for vector and host species pairs, while the points show infection totals (sums across matrix rows) and their 95% confidence intervals (error bars). C. Transmission over a complete transmission cycle from the viewpoint of mosquitoes (vector-to-vector transmission). As in Panel A, the matrices show medians for transmission estimates between species pairs, while the points and error bars show either sums across rows of the matrices (left plot) or the proportion of infections in the second generation that are in the same species as the original infected individual (center plot). Mosquito species are presented in a consistent order across panels to aid visualization of rank-order changes among panels.



## 162 **Half-transmission cycle**

### 163 **Host-to-vector transmission**

164 Integrating host physiological competence with host-to-vector transmission shows that host ranks can  
165 change dramatically when compared to ranks based solely on physiological competence (Figure 2B). De-  
166 spite large uncertainty in estimates for the number of mosquitoes that single infected hosts can infect over  
167 their infectious period, humans have both the largest estimated median and highest estimated potential  
168 (upper CI bound) for infecting mosquitoes in Brisbane. We predict that an infected human would pre-  
169 dominantly infect *Ae. vigilax*, followed by *Ae. procax* and *Cx. annulirostris*. Both rats and macropods,  
170 which had the highest physiological potential for transmission (Figure 2A), dropped beneath possums,  
171 birds, and horses according to median estimates, though overlapping CIs obscure our ability to definitively  
172 rank these species. Similarly, sheep dropped from being in the cluster of the highest ranked species when  
173 using physiological response alone (Figure 2A) to one of the lowest potential hosts for RRV transmission  
174 to mosquitoes in Brisbane (Figure 2B). Conversely, horses, which were one of the lower ranking species  
175 based on viremic response, increased in importance when considering the contribution of ecological traits  
176 to community transmission. Cats and dogs remained the lowest ranking species, unable to transmit RRV  
177 to any mosquitoes.

### 178 **Vector-to-host transmission**

179 *Cq. linealis*, *Ae. procax*, *Ae. vigilax*, and *Ve. funerea* remained the top four ranked vectors (by median esti-  
180 mates) after embedding mosquito physiological competence into vector-to-host transmission (Figure 3B),  
181 though wide overlapping CI make it impossible to differentiate among these species. We estimated that  
182 an infected *Cq. linealis* would mostly infect birds, while an infected *Ae. procax* and *Ae. vigilax* would in-  
183 fect a larger diversity of host species including birds, humans, and dogs. Of the remaining species, *Culex*  
184 *annulirostris*, *Cx. quinquefasciatus*, and *Cx. sitiens* remained low-ranking vectors, infecting only a small  
185 number of hosts.

## 186 **Complete-transmission cycle**

### 187 **Host-to-host transmission**

188 Estimated host importance changed little between host-to-vector and host-to-host transmission; humans  
189 remained the host of highest importance, followed by birds, possums, horses, and macropods (Figure 2C).  
190 We estimated that the mosquitoes that would acquire RRV from humans mostly go on to infect humans

191 ('self-infections'), followed by birds, dogs, and to a lesser extent possums. Even when weighting second  
192 generation infections by the proportion of hosts that mount a viremic response (i.e., ignoring all sink in-  
193 fections in dogs and thus counting second generation *infectious* hosts only), humans still produce the most  
194 second-generation infectious hosts (Figure S<sub>r</sub>1). We predicted that an infected bird (the species with the  
195 second highest estimated median) would primarily infect other birds, followed by dogs and humans, re-  
196 spectively (Figure 2C).

197 As humans are the only species without data from experimental infection studies (titer was measured  
198 when infected humans began showing symptoms), we re-ran our analyses assuming a host titer duration  
199 for humans reflecting only the observed human viremic period to assess how much our assumption of a  
200 quadratic titer curve projecting human titer to days prior to the observed data would impact host ranks.  
201 Even when human titer duration was reduced, humans remained the top estimated transmitter of RRV de-  
202 spite an overall lower total number of second generation infections (Figure S<sub>r</sub>2, Figure S<sub>r</sub>3). This highlights  
203 the robust result that humans contribute to the RRV transmission cycle in Brisbane due to their physiologi-  
204 cal competence, abundance, and attractiveness to competent vectors like *Ae. vigilax* and *Ae. procax*.

#### 205 **Vector-to-vector transmission**

206 Across a complete vector-to-vector transmission cycle, confidence intervals remained wide, preventing  
207 the model from confidently assigning mosquito species specific ranks using the total number of second-  
208 generation infected mosquitoes (Figure 3C left panel). Nonetheless, the results suggest that *Cq. linealis*, *Ae.*  
209 *procax*, *Ve. funerea*, *Ae. vigilax*, and *Ma. uniformis*, have a much higher maximum transmission potential  
210 than *Cx. annulirostris*, *Cx. quinquefasciatus*, *Cx. sitiens*, and *Ae. notoscriptus*.

211 Importantly, the results pictured in Figure 3C calculate second generation mosquito infections condi-  
212 tional on starting with a mosquito exposed to 6.4 log<sub>10</sub> infectious units of RRV per mL (the median dose  
213 used in experimental infection studies); if it is a rare event that a given mosquito species becomes exposed  
214 in the first place, basing mosquito importance on this metric could be misleading. For example, regard-  
215 less of the species of the originally infected mosquito (rows of the Figure 3C matrix), we predict that most  
216 second generation infections will be in *Ae. vigilax* followed by *Ae. procax* and *Cq. linealis* (columns of the  
217 Figure 3C matrix) because of their abundance and feeding preferences. Similarly, while it is true that an  
218 individual *Ve. funerea* or *Ma. uniformis* mosquito may have the highest potential for producing second-  
219 generation infections in mosquitoes (Figure 3C), their rarity (0.27% and 0.14% of the Brisbane mosquito  
220 community, respectively, according to our data; Table S3) means that few second generation infections from  
221 any source mosquito are in *Ve. funerea* or *Ma. uniformis*. Thus, unlike *Ae. vigilax*, *Ae. procax*, and *Cq. linealis*,

222 *Ve. funerea* or *Ma. uniformis* are very unlikely to play an important role in RRV transmission over multi-  
223 ple generations in this ecological context where they are relatively rare. This result highlights the utility  
224 of multi-generational transmission pathways among hosts and vectors, which incorporate physiological  
225 and ecological features that can lead to amplification, dilution, concentration, and dispersion of infections  
226 within and among species.

### 227 **Multiple generations of transmission**

228 Simulating the spread of infection over multiple generations, starting with one initially infected human in  
229 an otherwise susceptible vertebrate population in Brisbane, shows that infection spreads in the community  
230 with the largest number of new infections each generation in humans, birds, dogs, and horses (median  
231 estimates: [Figure 4](#); estimates with uncertainty: [Figure S<sub>r</sub>4](#)). Overall, while infection does circulate largely  
232 in the broader vertebrate community (as opposed to continuously cycling between a small subset of vectors  
233 and hosts), we estimated that at the beginning of an epidemic, the initial phases of transmission in Brisbane  
234 would be characterized by many infections in humans and birds, a moderate number of horse infections,  
235 and many sink infections in dogs. These new infected individuals (apart from dogs and cats) continue to  
236 spread infection in the community, and by the fifth generation of infection, the most dominant pathways of  
237 transmission are from birds to other birds, humans to other humans, humans to birds, horses to humans,  
238 and sink infections from both humans and birds to dogs ([Figure 4 Generation 5](#)).

239 Starting with an initial infection in a *Ma. uniformis* mosquito (to illustrate the effect of beginning with  
240 an infection in a rare species), the multi-generation approximation shows that after only a single generation  
241 the model predicts that the majority of infected mosquitoes will be *Ae. vigilax* and *Ae. procax*, and to a lesser  
242 extent *Cq. linealis* and *Cx. annulirostris* (median estimates: [Figure 4](#); estimates with uncertainty: [Figure S<sub>r</sub>5](#)),  
243 which mirrors the results in [Figure 3C](#). Despite the potentially high competence of *Ma. uniformis*, their rarity  
244 in the Brisbane mosquito community causes them to participate little in sustained community transmission.  
245 After 5 generations we predicted most transmission of RRV in Brisbane is occurring from *Ae. vigilax*, *Ae.*  
246 *procax*, and *Cq. linealis*; the dominance of these three species can be seen in [Figure 4](#), as is shown by the  
247 large number of pairwise transmission events between these species.

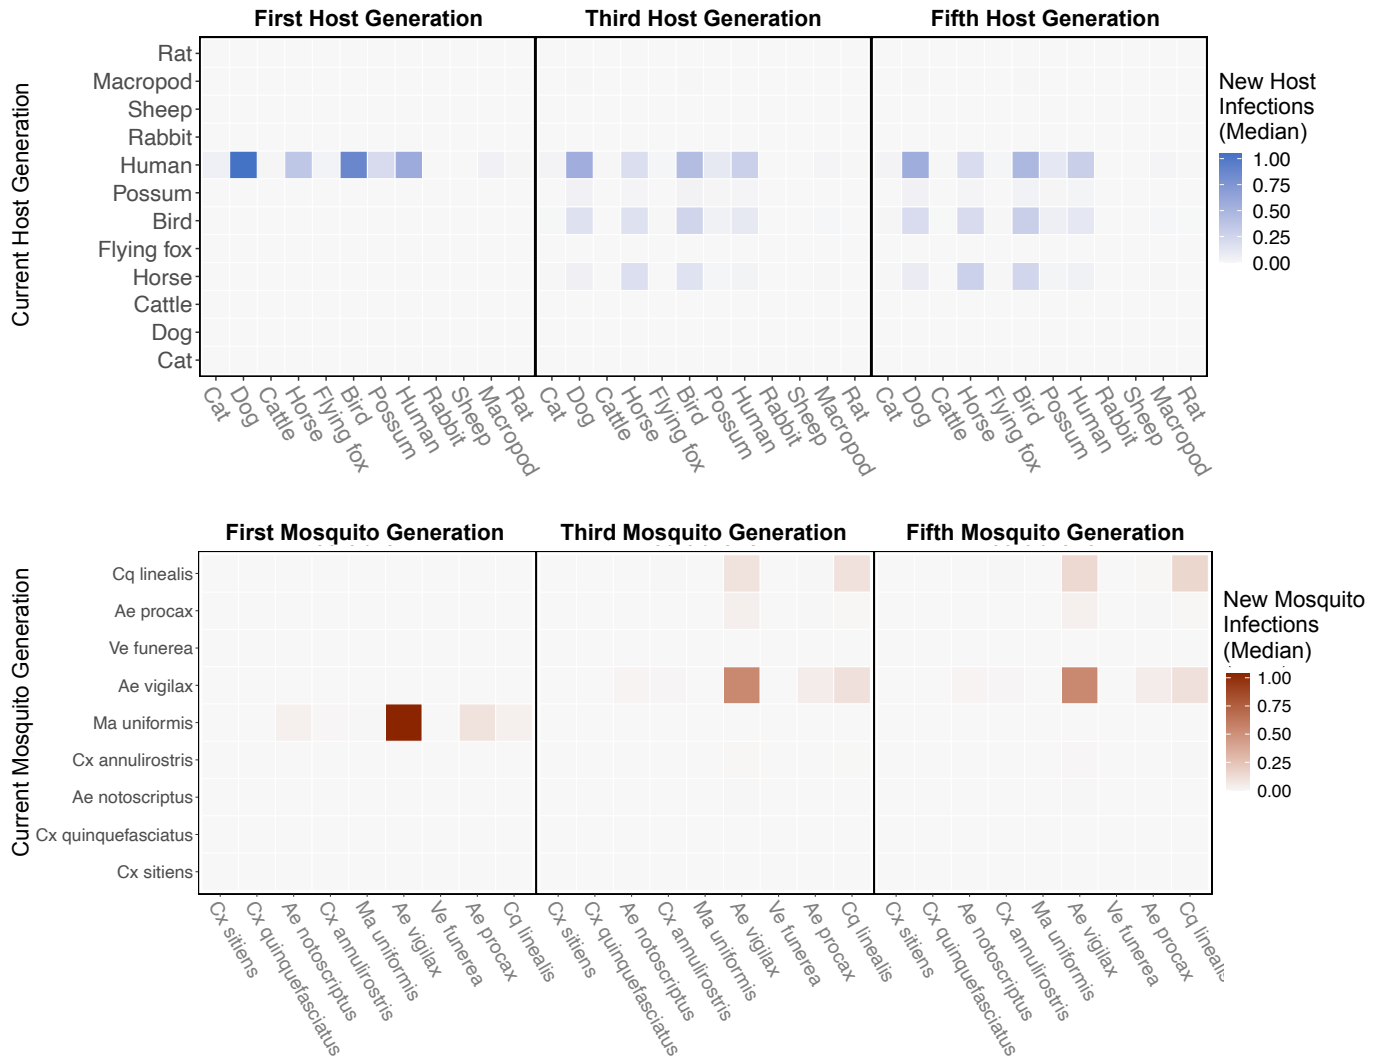

Figure 4: RRV epidemic dynamics simulated in two ways: transmission in the host community resulting from an initial infection in a human (top row), or transmission in the mosquito community arising from a source infection in a *Ma. uniformis* mosquito (bottom row). Each matrix cell contains the estimated number (median) of new infections in a given species (columns) arising from all infected individuals of a given species in the previous generation (rows). Uncertainty in the number of new infections in each host and mosquito species in each generation is shown in Figure S<sub>r</sub>4 and Figure S<sub>r</sub>5, respectively.

## 248 Discussion

249 Quantifying the role different species play in pathogen transmission is inherently difficult because it re-  
250 quires data from many species across disciplines and biological scales. Yet, the importance of quantifying  
251 the contribution a given species makes to disease transmission cannot be overstated. The pathogens respon-  
252 sible for many global pandemics, emerging infectious diseases, and seasonal epidemics have non-human  
253 origins. Thus, mitigating transmission of these pathogens requires species that serve as sources of infec-  
254 tion to be identified (Becker et al., 2020). The critical need to incriminate a species' role in transmission,  
255 combined with the challenge of measuring complex properties, has resulted in many alternative methods  
256 for quantifying and defining competence Table S1, increasing confusion about an already difficult problem.  
257 Here we assess and discuss how different measures used to quantify host and vector transmission capabil-  
258 ity can change which host and vector species are considered the most important. The advantage of using  
259 our nested approach and explicitly separating each of the steps is that it allows for an assessment of how  
260 the role of vectors and hosts change, isolating the factors that drive a given species' importance in a given  
261 ecological setting. Because ecological conditions differ geographically, the relative importance of different  
262 vectors and hosts may also differ, in ways our proposed method can quantify directly. Indeed, it would  
263 be informative to apply the models developed herein to other locations in Australia and the Pacific Islands  
264 and Territories where outbreaks of RRV occur.

### 265 Physiology meets ecology: changes in species importance

266 Physiological competence is foundational for elucidating the importance of a species in transmission cycles.  
267 On one hand, this metric is considered a fundamental prerequisite for identifying reservoirs or vectors of  
268 pathogens. On the other hand, when used independently of ecological data, it provides an incomplete  
269 picture of transmission and can be misleading. We found large differences between the hosts that had  
270 high physiological competence (macropods, rats, and sheep) and those that were predicted to produce to  
271 the greatest number of new RRV infections in mosquitoes and/or vertebrates in the Brisbane community.  
272 However, the opposite was the case for vectors, in which species that demonstrated high physiological  
273 competence mostly remained among the species with the highest capacity for community transmission in  
274 Brisbane when ecological factors were included (*Cq. linealis*, *Ae. procax*, and *Ae. vigilax*).

275 For many years, research has focused on macropods as the most important vertebrate hosts for RRV  
276 transmission based on their high physiological competence for transmitting RRV (e.g., Kay et al., 1986),  
277 and virus isolation events (Doherty et al., 1971). While our study does corroborate the high physiological  
278 competence of macropods, this group was not the most important for maintaining transmission within

279 Brisbane because of their relatively low abundance and limited feeding on by competent vectors. Rather,  
280 species with possibly lower physiological competence, especially humans and birds, contributed to a larger  
281 number of mosquito infections among different species (Figure 2B) and second generation host infections  
282 (Figure 2C) than the top ranking species by physiological competence (macropods, rats, and sheep). Vector-  
283 borne pathogens characteristically must pass through multiple infectious stages or species to complete their  
284 transmission cycle with each step influenced by host or vector factors. For instance, the immune response,  
285 which varies across species, can influence the outcome of infection and subsequent transmission (Komar  
286 et al., 2003). We also demonstrate that ecological factors, such as vector–host contact rate are also critically  
287 important for driving RRV transmission.

288 There have long been debates within the discipline of disease ecology, about how ecological interactions  
289 are important for moderating disease transmission through principles such as the dilution effect (Johnson  
290 and Thieltges, 2010), and zooprophylaxis (Donnelly et al., 2015). Our finding that the ecologies of com-  
291 petent species (hosts and vectors) are highly important for directing transmission in the community is  
292 not unique to RRV. A similar pattern has been observed for other vector borne diseases, including West  
293 Nile virus (WNV) in the United States. In a series of experimental infection studies that exposed over  
294 25 species of birds to WNV, Blue Jays (*Cyanocitta cristata*), Common Grackles (*Quiscalus quiscula*), House  
295 Finches (*Haemorhous mexicanus*), and American Crows (*Corvus brachyrhynchos*) were the most physiologi-  
296 cally competent species (Komar et al., 2003). These physiological findings were then applied in the context  
297 of WNV transmission under natural conditions in locations across the US (e.g., Kilpatrick et al., 2006, Al-  
298 lan et al., 2009, Nolan et al., 2013). For example, an assessment of host abundance and vector-host contact  
299 rates found that despite a moderate abundance of highly competent host species, American Robins (a host  
300 with average physiological competence), were responsible for infecting the largest number of mosquito  
301 vectors (Kilpatrick et al., 2006). This was attributed to a strong vector feeding preference for American  
302 Robins, despite them having a relatively low abundance compared to other host species. A similar result  
303 was observed in Texas, whereby Northern Cardinals were identified as the primary contributor to second  
304 generation host infections (Kain and Bolker, 2019) despite exhibiting low to moderate physiological com-  
305 petence (Kilpatrick et al., 2007). While ecological importance is often difficult to quantify, the nested ap-  
306 proaches used in our study clearly demonstrate that assuming host importance for multi-vector, multi-host  
307 pathogens based solely on physiologically competence studies does not translate to the hosts contributing  
308 to the largest number of infections under natural conditions.

309 Unlike the results of the vertebrate host analysis, our measures of vector physiological competence es-  
310 timates match the current understanding of important vectors of RRV. This is particularly true when all  
311 vector species are considered, irrespective of geographical origin (i.e., not just those present in Brisbane).

312 This highlights that *Ae. camptorhynchus* (recognised as a key vector species in temperate regions of Aus-  
313 tralia) has the highest capacity to become infected with and transmit RRV (Figure S<sub>m4</sub>), whilst indicating  
314 that *Cx. quinquefasciatus* and *Cx. sitiens* are poorly competent species (Kay et al., 1982a, Fanning et al.,  
315 1992). However, unlike for hosts, the ranking of Brisbane mosquito species varied little among the three  
316 nested metrics for quantifying mosquito importance. This could suggest that for vectors in this location,  
317 physiological competence in the absence of ecological data is sufficient for predicting the most important  
318 transmitters in a community. However, these results are more likely reflective of the fact that for RRV in  
319 Brisbane, the most physiologically competent mosquitoes obtain a moderate to high proportion of their  
320 blood meals on some of the most physiologically competent and abundant hosts.

321 Whilst we show that physiologically competent mosquito species possess ecological traits that con-  
322 tribute to their high ranking as RRV vectors, several studies of other zoonotic arboviruses highlight that  
323 the physiological competence of vectors does not mirror their importance for transmitting pathogens un-  
324 der natural conditions, and that one is not predictive of the other. There are cases where species with low  
325 physiological competence have caused epidemics due to their abundance and host feeding behaviours (for  
326 example Yellow Fever virus and *Ae. aegypti*: Miller et al., 1989). Conversely there are species that have been  
327 identified with high vector competence, but do not contribute to ongoing infections under natural condi-  
328 tions (Kilpatrick et al., 2005, Jansen et al., 2015). So while here we found few differences between the most  
329 physiologically competent RRV vector species and those that contribute to the greatest number of infections  
330 in Brisbane, we advocate that assessments of vector competence should include ecological data.

331 Although the model quantifies the physiological importance of vectors and hosts, and the number of  
332 infections species subsequently contribute in half and full transmission cycles, it is important to note that  
333 this is only relevant from the perspective of the population affected by the virus. For example, RRV is a  
334 disease of significant public health importance, and thus identifying the number and source of infections  
335 in humans is of high importance. From this perspective the results of the model highlight that there are a  
336 large proportion of infections from humans that result in the infection of other humans through *Ae. vigilax*  
337 in Brisbane. Therefore, to reduce infections in humans it would be more important to focus on vector control  
338 in *Ae. vigilax* populations or to continue to advocate the importance of personal protective measures, rather  
339 than targeting contacts between birds and *Cq. linealis*. However, if RRV caused high mortality in birds  
340 (like WNV does) and conserving bird populations were a primary concern, it would be more important to  
341 reduce the number of *Cq. linealis* individuals and thus adopt an appropriate control strategy.

## 342 **Transmission pathways of RRV in Brisbane**

343 After transmission is simulated over five generations (which may be equivalent to approximately 4 months),  
344 the largest number of infections are seen in humans, birds, dogs, and horses. However, infection does  
345 spread more widely into the community, primarily by the highly competent and generalist feeder *Ae. vigi-*  
346 *lax*. Despite large uncertainty, our findings for RRV transmission cycles in Brisbane hint at two semi-distinct  
347 but overlapping transmission cycles: an enzootic and a domestic cycle. The enzootic cycle is characterized  
348 primarily by transmission between birds and *Cq. linealis*, while the domestic cycle is characterized by  
349 human-to-human infections facilitated by *Ae. vigilax* and *Ae. procax*. These two cycles are linked by the  
350 feeding generalist *Ae. procax* (and also *Ae. vigilax*), which transfers infection between birds and humans.  
351 Within each of these overlapping cycles, dogs play a role in diluting infectious bites as they are not able  
352 to amplify RRV. Though this paper is primarily concerned about the drivers of within transmission season  
353 epidemics in humans, it is important to note that human cases of RRV in Brisbane are seasonal, and tend to  
354 peak in spring. This model does not predict the timing and peak of epidemic events (as it was not the prin-  
355 cipal aim of this model); however, the identification of multiple transmission pathways will allow for future  
356 research to formulate hypotheses for RRV seasonality. Specifically, data would need to be collected across  
357 seasons to distinguish the role of seasonality and the timing/drivers of spillover that shift transmission  
358 from an enzootic to domestic cycle.

359 Multiple transmission cycles for RRV have long been hypothesized (Harley et al., 2001), yet no previ-  
360 ous studies have implicated the species involved in these and quantified their contribution to transmission.  
361 Humans and birds have been greatly understudied as potential hosts of RRV, yet unlike marsupials, they  
362 persist across the geographic distribution of RRV. Despite frequent detection of RRV in major metropolitan  
363 centers (Clafin and Webb, 2015), the potential for humans to contribute to endemic transmission (as op-  
364 posed to epidemic transmission: Rosen et al. 1981, Aaskov et al. 1981) has empirically been understudied.  
365 Our results suggest that humans should be seriously examined as a potential primary contributor to RRV  
366 transmission.

367 There is also much interest in the transmission dynamics of RRV in horses because they are often symp-  
368 tomatic (El-Hage et al., 2020). Because we included the proportion of the population seroprevalent in Fig-  
369 ure 2 and Figure 3, we estimate that new infections in horses contribute little to measures of host and vector  
370 importance. While we estimate horses would play a moderate role in an epidemic beginning in a fully sus-  
371 ceptible population (Figure 4), the long lifespan and high seroprevalence of horses likely means that they  
372 contribute much less to RRV transmission in Brisbane than is suggested in our epidemic approximation.

373 The vectors identified in Brisbane transmission cycles, *Ae. vigilax*, *Ae. procax* and *Cq. linealis*, are recog-



374 nised as important vectors for RRV and are regularly targeted in vector control programs. However, *Cx.*  
375 *annulirostris* and *Ae. notoscriptus* were low ranked vectors in the model, but are often cited as being key RRV  
376 vectors in Brisbane (Kay and JG, 1989, Russell, 1995, Watson and Kay, 1998). The evidence in favour of *Cx.*  
377 *annulirostris* as a vector is that RRV is frequently detected in wild caught individuals, and that abundance  
378 has been high during previous outbreaks of RRV (Jansen et al., 2019). Despite this, here we predict that  
379 *Cx. annulirostris* is a less important vector for RRV in Brisbane, even in spite of its abundance (Table S3),  
380 because of its low physiological competence for transmitting RRV (Figure S<sub>m</sub>3, Figure S<sub>m</sub>5). Similarly for  
381 *Ae. notoscriptus*, RRV has been isolated from the species during outbreaks in Brisbane (Ritchie et al., 1997),  
382 however the species had relatively low abundance in this study, and low transmission ability (Figure S<sub>m</sub>5)  
383 in comparison to other potential vectors. *Aedes notoscriptus* can be very common in suburban Brisbane, but  
384 had a median abundance in the trap locations and season during this study (Kay et al., 2008). Though the  
385 isolation of RRV from wild caught mosquitoes demonstrates that a particular species is infected with the  
386 virus, it is incomplete evidence that that mosquito species can subsequently transmit the virus. Even if  
387 found infected in the field, the lower transmission capability of *Cx. annulirostris* or *Ae. notoscriptus* relative  
388 to *Ae. vigilax*, *Ae. procax* and *Cq. linealis* means that each infected *Cx. annulirostris* or *Ae. notoscriptus* is likely  
389 to transmit infection to fewer hosts than an infected *Ae. vigilax*, *Ae. procax* or *Cq. linealis*.

## 390 **Model caveats and uncertainty**

391 It is important to acknowledge that there are a number of caveats with the raw data, experiments, and  
392 model assumptions that influence the outcomes of our model. For physiological competence, experimental  
393 studies varied greatly in their methods for infecting species with RRV and with assays subsequently used  
394 to detect infection. Wherever possible, we converted published data to increase the comparability between  
395 studies. For instance, infectious units used to measure virus titers were converted to infectious units per  
396 milliliter (IU/mL), rather than per 0.1 mL or per 0.002 mL, which reflects the the approximate volume of  
397 blood a mosquito imbibes whilst blood feeding (see the online supplemental information (SI) and Meth-  
398 ods for more details). However, even with these considerations it is difficult to account for the variance in  
399 experimental approaches between laboratories and across time; even using a random effect of “study” is  
400 rather ineffective because of identifiability problems between species and study (many species are only rep-  
401 resented in a single study). For the ecological data, the methods used to collect species abundance data (e.g.,  
402 traps for mosquitoes and non-invasive surveys for vertebrates) can also result in bias as different traps at-  
403 tract different species (Brown et al., 2014, Lühken et al., 2014). As such, the species trapped using CO<sub>2</sub>-baited  
404 light traps in this study may not be a true representation of the mosquito community in Brisbane. Similarly

405 for vertebrates, the methods are biased against detecting species with cryptic behavior, and thus represent  
406 a biased sample of the host community available to host-seeking mosquitoes. While acknowledging these  
407 limitations in the data collection efforts, the methods were still appropriate to address the principal aims of  
408 this study. A model is only representative of the data that is available. These nuances of the raw data can  
409 influence the outcomes of the model; however, a clear advantage of our model here is that for each dataset  
410 used the uncertainty within that data is accounted for. In doing so, data with high uncertainty, such as host  
411 experimental infections, can be targeted in future studies to help refine the outcomes of the model.

412 Though this model was able to identify hosts and mosquitoes that are likely the most important for RRV  
413 transmission in Brisbane, it does not capture the entire host community. There are many potential hosts that  
414 are not included in this Brisbane transmission model due to a paucity of data. As a minimum requirement,  
415 hosts were only included if there was evidence for mosquitoes blood feeding on them, experimental expo-  
416 sure to the virus, seroprevalence data, and abundance data in Brisbane. In some instances, to meet these  
417 minimum data requirements species were aggregated by taxonomic group (such as 'birds' which comprised  
418 of chickens, little corellas, and Pacific black ducks). In other instances (such as the potential for koalas to  
419 be hosts of RRV), species were unable to be modelled because of an absence of viremia data. Further, we  
420 ignore seasonal matching of transmission with host reproduction, ignore duration of host life stages, and  
421 either make a snapshot measure of host transmission capability (Figure 2, Figure 3) or make a simple five  
422 generation approximation that averages across host and vector infectious periods. Together, these assump-  
423 tions may result in biased estimates of the importance of hosts with short life cycles or with reproductive  
424 life cycles that overlap with a transmission season. More broadly, because we assume a homogeneously  
425 mixing host and mosquito community at the scale of all of Brisbane and ignore all other ecological factors  
426 that control interactions between hosts and mosquitoes apart from mosquito feeding preferences, we likely  
427 miss transmission cycles that are more nuanced than those we were able to detect here. Similarly, some  
428 hosts and vectors may only be locally important for RRV transmission, as opposed to being important over  
429 the entire geographic distribution of the virus. For example though sheep have high physiological impor-  
430 tance, they were not locally important in Brisbane, but may play a greater role in the maintenance and  
431 spillover of RRV in rural areas where other species of mosquitoes with higher biting affinity for sheep may  
432 exist.

433 For mosquitoes, datasets with the greatest gaps included host feeding data, physiological transmission  
434 capability, and mosquito survival. Blood meal data is difficult to collect, but is very important for the out-  
435 comes of this model because feeding patterns enters into the equation twice for vector-to-vector transmis-  
436 sion. Uncertainty in feeding patterns can have a large influence over the width of the CI in Figure 3C. More  
437 laboratory experiments on mosquito transmission probability over time, especially for those species with

438 little data that we predict have the potential to be strong transmitters (e.g., *Ma. uniformis* and *Ve. funerea*;  
439 see [Figure S<sub>m</sub>5](#)) would also help to better resolve transmission patterns in the Brisbane community. The  
440 confidence intervals for these species are particularly wide, which could place them as highly important  
441 vectors, or the opposite, highly inefficient vectors. Finally, because we assumed identical survival for all  
442 species without uncertainty, (i.e., survival did not contribute to the widths of the confidence intervals across  
443 species), the uncertainty we present is actually an underestimate; species-specific field-based mortality rates  
444 are a crucial data source that needs to be obtained for more accurate measures of mosquito transmission  
445 capability. It is important to note, however, that even in spite of large uncertainty obscuring ranks for a  
446 single generation of transmission ([Figure 3C](#)), the rarity of many of these species renders these CI mostly  
447 irrelevant when approximating transmission over multiple generations. That is, across generations, we are  
448 able to predict that *Ae. procax*, *Ae. vigilax*, and *Cq. linealis* are likely to be important transmitters in the  
449 Brisbane community.

## 450 **Applications for other vector borne diseases**

451 This model can be applied to other vector-borne diseases in a number of ways. A principal application  
452 would be to use this model to identify vectors and hosts for other multi-host, multi-vector pathogens,  
453 including Rift Valley fever virus ([Turell et al., 2008](#), [Davies and Karstad, 1981](#), [Gora et al., 2000](#), [Busquets  
454 et al., 2010](#)); West Nile virus ([Kain and Bolker, 2019](#)), or yellow fever virus ([Rosen, 1958](#), [Jupp and Kemp,  
455 2002](#)), for which competence data exists for several species. For these diseases, our model and code can be  
456 used by substituting data and modifying the underlying statistical sub-models (e.g., titer profiles) to match  
457 the dynamics of the pathogen of interest; the subsequent calculations for host and vector competence, half-  
458 cycle transmission, and complete-cycle transmission are usable without modification. The generality of  
459 this model, and its nested approach can also support (with minimal modification) additional transmission  
460 pathways such as vertical transmission (where mosquitoes emerge from immature stages already infected  
461 with a given pathogen), or direct vertebrate-to-vertebrate transmission as can occur for some vector-borne  
462 diseases such as Rift Valley fever virus ([Wichgers Schreur et al., 2016](#)).

463 Secondary applications for this model could include identifying the largest gaps and uncertainties  
464 within datasets. This is advantageous because in light of finite resources, model-guided research can iden-  
465 tify the single most important dataset needed to improve predictions for disease emergence and transmis-  
466 sion. Another application would be to rerun the model for a single pathogen across space and time. This is  
467 useful to compare shifts in transmission dynamics, or spillover. In the case of RRV, which has a large geo-  
468 graphic distribution, it is expected that transmission would vary across locations, and over time. Though

469 our model has not been developed to predict the timing and peak of epidemic events, it can be used to  
470 disentangle the underpinning transmission dynamics of vector-borne diseases in specific locations, which  
471 allows for the development of predictive modeling.

472 Finally the generality of this model provides a common language to compare and contrast the trans-  
473 mission dynamics not just within a single pathogen, but also between them. Until now, the highly diverse  
474 methods, definitions and data required to characterise vectors and hosts has confounded the ability to  
475 make comparisons between pathogens. The integration of multidisciplinary data in this model is done  
476 in a way that could be used to compare host or vector physiological competence and ecological traits for  
477 multi-pathogens.

## 478 **Conclusion**

479 Identifying different vectors and hosts of zoonotic arboviruses is critical for mitigating emerging infectious  
480 diseases and understanding transmission in a changing world. However, attempts to do so have been con-  
481 founded by the multidisciplinary datasets required and differing definitions that can alter the importance  
482 of a species. Here we developed a nested approach that can be applied to any multi-host, multi-vector  
483 pathogen for which some competence data exists. Applying this approach to Ross River virus transmission  
484 in Brisbane we were able to identify two previously underestimated hosts (humans and birds), two poten-  
485 tial transmission cycles (an enzootic cycle and a domestic cycle), and datasets which should be targeted  
486 (bloodmeal studies, host experimental infections) to reduce overall uncertainty and ultimately increase the  
487 future power of the model. Future studies that aim to identify and quantify the importance of different  
488 species in virus transmission cycles must integrate both physiological competence data and ecological as-  
489 sessments to more fully understand the capacity of species to transmit pathogens. The nested approach  
490 here provides a tool to integrate these different datasets, while acknowledging uncertainty within each and  
491 could be applied to any multi-host, multi-vector pathogen for which some competence data exists.

## 492 **Materials and Methods**

493 The methods are presented in three sections to reflect our three focal questions. First, we describe the calcu-  
494 lation of host and vector physiological competence. The second section details half-cycle (host-to-vector and  
495 vector-to-host transmission) and complete-cycle (host-to-host and vector-to-vector) transmission. Finally,  
496 in the third section we describe how we use complete-cycle transmission to approximate transmission over  
497 multiple generations. We introduce data and calculations for model components that are used in multiple

498 transmission metrics (e.g., host titer profiles) with the first metric in which they are used.

## 499 **Host and vector physiological competence**

### 500 **Vertebrate hosts: titer profiles**

501 We quantified a vertebrate host species' physiological competence as the proportion of individuals of that  
502 species that develop a viremic response when exposed to infection multiplied by the area under the titer  
503 profile of the individuals that develop viremia. For each of 15 experimentally infected non-human verte-  
504 brate species we extracted the proportion of exposed individuals that developed detectable viremia, their  
505 duration of detectable viremia in days, their peak viremia titer, and the unit of measure of this titer (such  
506 as median lethal dose (LD50), suckling mouse intracerebral injection (SMIC50)) (from [Whitehead, 1969](#),  
507 [Spradbrow et al., 1973](#), [Rosen et al., 1981](#), [Kay et al., 1986](#), [Ryan et al., 1997](#), [Boyd et al., 2001](#), [Boyd and Kay,](#)  
508 [2002](#)). For non-human species, only means and standard deviations for peak titer and duration of detectable  
509 titer were reported. We transformed these summary measures into continuous titer profiles spanning the  
510 duration of each host's infectious period (which are needed to quantify mosquito infection probability) by  
511 modeling titer profiles as quadratic functions of time since infection, based on observed patterns in the data.  
512 For human titer profiles, for which experimental infection studies were not available, we used data from  
513 one observational study ([Rosen et al., 1981](#)) that measured titer in humans exhibiting disease symptoms  
514 during an outbreak in the Cook Islands in 1980. Details on how we constructed continuous titer curves  
515 for all hosts are available in the Supplemental Methods. In [Figure S<sub>m</sub>1](#) we show 95% confidence intervals  
516 (CI) for each of the hosts' quadratic profiles generated from this procedure with the raw summary values  
517 of peak and duration of titer extracted from the literature overlaid (the area under the curve for these titer  
518 profiles are shown in [Figure S<sub>m</sub>2](#)).

### 519 **Mosquito vectors: infection and transmission probability**

520 We measured a mosquito species' physiological competence as the area under the curve of infection prob-  
521 ability curve versus dose multiplied by the area under the curve of transmission probability curve over  
522 time. From experimental infections of mosquitoes we collected information on the infectious dose they  
523 were exposed to, the number of mosquitoes receiving an infectious dose, the proportion of mosquitoes that  
524 became infected, the proportion of mosquitoes that went on to become infectious, and the time it took for  
525 mosquitoes to become infectious (the extrinsic incubation period) (from [Kay et al., 1979, 1982a, Kay, 1982,](#)  
526 [Kay et al., 1982b, Ballard and Marshall, 1986, Fanning et al., 1992, Vale et al., 1992, Wells et al., 1994, Doggett](#)  
527 [and Russell, 1997, Watson and Kay, 1998, Jennings and Kay, 1999, Ryan et al., 2000, Doggett et al., 2001,](#)

528 [Jeffery et al., 2002](#), [Kay and Jennings, 2002](#), [Jeffery et al., 2006](#), [Webb et al., 2008](#), [Ramírez et al., 2018](#)). We  
529 modeled both mosquito infection and transmission probability using generalized linear mixed effects mod-  
530 els (GLMM) with Binomial error distributions, fit in R using the package `lme4` ([Bates et al., 2015](#)). For each  
531 model, the proportion of mosquitoes infected or transmitting was taken as the response variable and the  
532 total number exposed to infection was used as weights; species were modeled using random effects. For  
533 additional details see Supplemental Methods. Fitted infection probability curves for all mosquito species  
534 for which we gathered data—those found in Brisbane and elsewhere in Australia—are shown in [Figure S<sub>m3</sub>](#)  
535 and [Figure S<sub>m4</sub>](#); transmission probability curves are shown in [Figure S<sub>m5</sub>](#) and [Figure S<sub>m6</sub>](#).

### 536 Half-cycle and complete-cycle transmission

537 Both half-cycle (host-to-vector and vector-to-host) and complete-cycle (host-to-host and vector-to-vector)  
538 transmission nest host and vector physiological competence in an ecological context ([Figure 1](#)). To quantify  
539 each of these metrics we used a next-generation matrix (NGM) model ([Diekmann et al., 1990](#), [Hartemink  
540 et al., 2009](#)), which, for a vector-borne disease, requires the construction of two matrices of transmission  
541 terms. The first matrix (denoted **HV**, where bold terms refer to matrices) contains species-specific host-to-  
542 vector transmission terms, which we write with hosts as rows and vectors as columns. The second matrix  
543 (**VH**) contains vector-to-host transmission terms and has vectors as rows and hosts as columns. Cells of  
544 **HV** and **VH** contain the expected average number of infections between pairs of species over the whole  
545 infectious period of the infector (host in **HV**, vector in **VH**); each pairwise transmission term is a function  
546 of host and vector physiological competence as well as ecological factors. Row sums of **HV** give the total  
547 number of vectors (of all species) infected by each host (total host-to-vector transmission); similarly row  
548 sums of **VH** give the total number of hosts (of all species) infected by infectious vectors.

549 We calculate the total number of individuals of each mosquito species  $j$  that a host of species  $i$  infects  
550 over its infectious period  $d$  (which gives entry  $[i, j]$  of **HV**) as:

$$Iv_{ij} = \sum_{d_i=1}^{D_i} (p_j | \theta_{id_i}) \cdot \omega_i \cdot \phi_{ij} \cdot \sigma_j \cdot \frac{\beta_{ij} \alpha_i}{\sum_{i=1}^I \beta_{ij} \alpha_i}, \quad (1)$$

551 where  $p_j | \theta_{id_i}$  is the probability a susceptible species of mosquito ( $j$ ) would become infected when biting  
552 host  $i$  on day  $d_i$  with titer  $\theta_{id_i}$ . The proportion of individuals of species  $i$  that manifest an infection with  
553 titer  $\theta_{id_i}$  is given by  $\omega_i$ , while  $\phi_{ij}$  is the number of susceptible mosquitoes of species  $i$  per host species  $j$ ,  
554  $\sigma_j$  is the daily biting rate of mosquito species  $j$ , and  $\frac{\beta_{ij} \alpha_i}{\sum_{i=1}^I \beta_{ij} \alpha_i}$  is the proportion of all mosquito species  $j$ 's

555 bites on host species  $i$ , which is jointly determined by the relative abundance of host  $i$  ( $\alpha_i$ ) and the intrinsic  
 556 feeding preference of mosquito  $j$  on host  $i$  ( $\beta_{ij}$ ) (details given in *Mosquito feeding behavior* below). This  
 557 calculation assumes no species specific host-by-mosquito interactions for infection probability; mosquito  
 558 infection probability is uniquely determined by the level and duration of titer within a host (i.e., a dose-  
 559 response function of host titer). The only direct evidence against this assumption that we are aware of is  
 560 an example where more *Cx. annulirostris* became infected when feeding on a bird than on a horse despite  
 561 there being a lower viremia in the bird (Kay et al., 1986).

562 The total number of individuals of each host species  $i$  that a mosquito of species  $j$  infects over its infec-  
 563 tious period  $r_j$  (which gives entry [j, i] of **VH**) is given by:

$$Ih_{ji} = \sum_{r_j=1}^{R_j} p_{ir_j} \cdot \eta_j \cdot \lambda_{jr_j} \cdot \sigma_j \cdot \frac{\beta_{ij}\alpha_i}{\sum_{i=1}^I \beta_{ij}\alpha_i}, \quad (2)$$

564 where  $p_{ir_j}$  is the probability an infected mosquito of species  $j$  transfers infection to a susceptible host given  
 565 a bite on day  $r_j$  of their infectious period,  $\lambda_{jr_j}$  is the probability of survival of mosquito species  $j$  until day  
 566  $r_j$ ,  $\sigma_j$  is the daily biting rate of mosquito species  $j$ , and  $\frac{\beta_{ij}\alpha_i}{\sum_{i=1}^I \beta_{ij}\alpha_i}$  is the proportion of all mosquito species  
 567  $j$ 's bites on host species  $i$ .

568 The key differences between the host-to-vector (**HV**;  $Iv_{ij}$ ) and vector-to-host (**VH**;  $Ih_{ji}$ ) transmission  
 569 matrix entries are two-fold. First, **HV** assumes that host infectivity is titer- and time-dependent and de-  
 570 pends on mosquito density per host; conversely, **VH** assumes that mosquito infectiousness is titer-independent  
 571 (dose-independent) but time-dependent and depends on daily mosquito survival and host species relative  
 572 abundance. Second, for **HV** we assume a single infected host of a given species enters into a community of  
 573 susceptible mosquitoes, while for **VH** we assume that a single mosquito of a given species becomes exposed  
 574 to a dose of 6.4 log<sub>10</sub> infectious units per mL (the median dose used across all mosquito infection studies)  
 575 and then enters a host community with empirically estimated background host immunity (Doherty et al.  
 576 1966, Marshall et al. 1980, Vale et al. 1991, Boyd and Kay 2002, Faddy et al. 2015, Skinner et al. 2020; see  
 577 Table S4). The primary similarity between these matrices is that mosquito biting rate, host abundance, and  
 578 mosquito feeding preference ( $\sigma_j$  times the fraction of  $\alpha$  and  $\beta$  terms) are used in both matrix calculations  
 579 as the components that control the contact rate between infected hosts and susceptible mosquitoes (**VH**) or  
 580 infected mosquitoes and susceptible hosts (**VH**).

581 Complete-cycle transmission is calculated using the matrix product of **HV** and **VH**, which is commonly  
 582 referred to as the “who acquires infection from whom” matrix (Schenzle, 1984, Anderson and May, 1985,  
 583 Dobson, 2004). Specifically, using **HV**\***VH** gives **G<sub>HH</sub>**, in which each cell describes the total number of pair-

584 wise host-to-host transmission events, assuming a single infected host appears at the start of its infectious  
585 period in an otherwise susceptible host population. Likewise, using  $\mathbf{VH*HV}$  gives  $\mathbf{G}_{VV}$ , in which each  
586 cell describes the total number of pairwise mosquito-to-mosquito transmission events, assuming a single  
587 infected mosquito appears at the start of its infectious period in an otherwise susceptible mosquito popula-  
588 tion. Row sums of  $\mathbf{G}_{HH}$  give the total number of new host infections in the second generation that originate  
589 from single source infections in each host species (total host-to-host transmission), or the total number of  
590 mosquito-to-mosquito transmission events in the case of  $\mathbf{G}_{VV}$ . Column sums of  $\mathbf{G}_{HH}$  or  $\mathbf{G}_{VV}$  give the total  
591 number of newly infected individuals of each host or mosquito species arising from one infection in each  
592 host or mosquito, respectively. These properties can be used to find, for example, dead-end hosts (i.e., “di-  
593 luters”; [Schmidt and Ostfeld, 2001](#)), which would be captured by host species with a small row sum and  
594 large column sum in  $\mathbf{G}_{HH}$ . Further, [Diekmann et al. \(1990\)](#) show that the dominant eigenvalue of either  
595  $\mathbf{G}_{HH}$  or  $\mathbf{G}_{VV}$  describes the  $\mathcal{R}_0$ , the typical number of secondary cases, resulting from pathogen transmission  
596 in the heterogeneous community whose pairwise transmission dynamics are described in  $\mathbf{HV}$  and  $\mathbf{VH}$ .

597 We estimated each of the parameters of  $\mathbf{HV}$  and  $\mathbf{VH}$  using either statistical models fit to empirical data  
598 or directly from empirical data taken from the literature; when data was sparse or non-existent we used  
599 assumptions based on expert opinion. All model components and the data used to parameterize them are  
600 listed in [Table 1](#); details on vertebrate host abundance, mosquito survival, and mosquito feeding behavior  
601 are described below.

## 602 **Vertebrate hosts: abundance**

603 Vertebrate abundance data for Brisbane were obtained from published literature (synthesized previously  
604 for [Skinner et al., 2020](#)). We used the observed proportion of each species detected in these surveys as the  
605 proportion of that species in our community for our analysis ([Table S5](#)), which assumes that the observed  
606 species proportions are unbiased predictors of their true proportions.

## 607 **Mosquito survival**

608 Survival data (either field or laboratory) for the mosquito species present in Brisbane, Australia, is lacking  
609 for most species. For this reason, we modeled mosquito survival as being identical for all species. Specifi-  
610 cally, we used an exponential decay model for mosquito survival using a daily survival probability that is  
611 half of the daily maximum survival rate of *Culex annulirostris* (calculated as  $1/\text{lifespan}$ ) measured in optimal  
612 laboratory conditions ([Shocket et al., 2018](#)) (which may over-estimate survival rates in nature).



Table 1: **Model components, the transmission metrics in which they are used, and the data and statistical modelling choices used to estimate each.** The column "Parameter" lists the parameters as they appear in Eq. 1 and Eq. 2. Abbreviations for the transmission metrics are: HC = host competence; H-to-V = host-to-vector transmission; V-to-H = vector-to-host; H-to-H = host-to-host; V-to-V = vector-to-vector. The "Data" column lists the name of the supplemental file containing the raw data; all citations are listed in the online supplement. The "Methodological Details" column lists where in the manuscript methods are described.

| Model Component                                                                           | Parameter                                                    | Transmission Metrics               | Data                                     | Statistical Model                                                      | Methodological Details                                                                                                       |
|-------------------------------------------------------------------------------------------|--------------------------------------------------------------|------------------------------------|------------------------------------------|------------------------------------------------------------------------|------------------------------------------------------------------------------------------------------------------------------|
| Proportion of individuals of host species $i$ exposed to infection that produce viremia   | $\omega_i$                                                   | HC, H-to-V, H-to-H, V-to-V         | host_response.csv, human_titer.csv       | Raw Data                                                               | <i>Methods: Vertebrate hosts: titer profiles; Supplemental Methods: Host physiological competence; Table S2</i>              |
| Host titer (in species $i$ on day $j$ )                                                   | $\theta_{id_i}$                                              | HC, H-to-V, H-to-H, V-to-V         | host_response.csv, human_titer.csv       | Linear model with a quadratic term for days post infection             | <i>Methods: Vertebrate hosts: titer profiles; Supplemental Methods: Host physiological competence; Figure S<sub>m</sub>1</i> |
| Proportion of host species $i$ that are seronegative                                      | $\eta_j$                                                     | V-to-H, H-to-H, V-to-V             | host_seroprevalence.csv                  | Raw Data                                                               | <i>Table S4</i>                                                                                                              |
| Infection probability of mosquito species $j$ as a function of dose                       | $p_j$                                                        | VC, H-to-V, V-to-H, H-to-H, V-to-V | mosquito_infection.csv                   | Generalized linear model (logistic regression)                         | <i>Mosquito vectors: infection and transmission probability; Supplemental Methods: Vector physiological competence</i>       |
| Transmission probability of mosquito species $j$ $r$ days post infection                  | $p_{ir_j}$                                                   | VC, V-to-H, H-to-H, V-to-V         | mosquito_transmission.csv                | Generalized linear model (logistic regression)                         | <i>Mosquito vectors: infection and transmission probability; Supplemental Methods: Vector physiological competence</i>       |
| Survival probability of mosquito species $j$ up to $r$ days post infection                | $\lambda_{jr_j}$                                             | V-to-H, H-to-H, V-to-V             | –                                        | Exponential decay using point estimate for daily mortality probability | <i>Methods: Mosquito survival</i>                                                                                            |
| Proportion of mosquito species $j$ 's blood meals that are obtained from host species $i$ | $\frac{\beta_{ij}\alpha_i}{\sum_{i=1}^I \beta_{ij}\alpha_i}$ | V-to-H, H-to-H, V-to-V             | mosquito_feeding.csv, host_abundance.csv | Custom Bayesian regression model                                       | <i>Methods: Mosquito feeding preference; Supplemental Methods: Mosquito feeding preference</i>                               |
| Number of susceptible mosquitoes of species $i$ per host species $j$                      | $\phi_{ij}$                                                  | H-to-V, H-to-H, V-to-V             | mosquito_abundance.csv                   | Raw Data + Assumption                                                  | –                                                                                                                            |
| Daily biting rate of mosquito species $j$                                                 | $\sigma_j$                                                   | H-to-V, V-to-H, H-to-H, V-to-V     | –                                        | Assumption                                                             | –                                                                                                                            |

### 613 Mosquito feeding behavior

614 We modeled the observed blood meals in wild-caught mosquitoes (the number of blood fed mosquitoes  
615 and the source of the blood meals) (from Ryan et al., 1997, Kay et al., 2007, Jansen et al., 2009) as arising  
616 jointly from the abundance of each host in the community (from Skinner et al., 2020) and each mosquitoes'  
617 intrinsic feeding preference on each host species. Specifically, we modeled the number of blood meals a  
618 mosquito of species  $j$  obtains from host species  $i$  ( $\delta_{ij}$ ) as:

$$\delta_{ij} \sim \text{Multi}(N, \frac{\beta_{ij}\alpha_i}{\sum_{i=1}^I \beta_{ij}\alpha_i}), \quad (3)$$

619 where  $\delta_{ij}$  is a multinomially distributed random variable (the extension of the binomial distribution for  
620 greater than two outcomes) with probability equal to the intrinsic preference of mosquito  $j$  for host species  
621  $i$  ( $\beta_{ij}$ ), weighted by the abundance of host species  $i$  ( $\alpha_i$ ), relative to all host species in the community (sum  
622 over all host species in the denominator). Written in this way,  $\beta_{ij}$  is the ratio of the proportion of bites  
623 mosquito species  $j$  takes on host species  $i$  relative to biting host species  $j$  directly in proportion to their  
624 abundance in the community (which would occur if a mosquito were biting randomly). We fit this multi-  
625 nomial model in a Bayesian context in Stan (Carpenter et al., 2017), interfaced with R using the package  
626 rstan (Stan Development Team 2017). For details on the fitting of this Bayesian model see the supplemen-  
627 tal methods; the full Stan model is also available in the online supplemental material.

### 628 Tailoring the model to the Brisbane community

629 One difficulty with the integration of diverse data types is variation in the biological scale at which these  
630 data are collected. For our model, vertebrate host types are recorded at different taxonomic levels across  
631 data sets (e.g., laboratory infection experiments are conducted at the species level while mosquito blood  
632 meal surveys report identification of the blood meal host source at a taxonomic level ranging from species  
633 through to higher level classification such as class or family). In order to integrate the predictions from  
634 our individual sub-models fit to single data types (e.g., infection experiments and blood meal surveys) to  
635 parameterize **HV** and **VH**, and thus draw inference on the importance of different hosts and mosquitoes  
636 in RRV transmission Brisbane, Australia, we made three simplifying assumptions. First, we averaged each  
637 mosquito's infection probability when biting 'birds' (the taxonomic level available for blood meal data) for  
638 the three species of birds with a measured viremic response (Pacific black duck: *Anas superciliosa*, domestic  
639 chicken: *Gallus gallus domesticus*, and little corella: *Cacatua sanguinea*) and 'macropods' for the two macro-

640 pod species with a measured viremic response (agile wallaby: *Macropus agilis* and eastern grey kangaroo:  
641 *Macropus giganteus*). This averaging implicitly assumes (in the absence of species-level information) that all  
642 birds and all macropods respond identically to infection. Second, we summed all individuals of all bird  
643 species and all macropod species recorded in the Brisbane host surveys in order to calculate the relative  
644 abundance of each of these host types to match the aggregation of titer profiles (see [Table S5](#) for the relative  
645 abundance of each host type in Brisbane). Finally, we retained only nine total mosquito species for which  
646 we had both abundance data and blood meal data ([Table S3](#)); though this excludes many potentially rele-  
647 vant mosquito species, the nine species we retained account for 90% of the Brisbane mosquito community  
648 according to our abundance data ([Table S3](#)). Our inference on host importance in Brisbane, Australia is thus  
649 focused on the following host groupings: birds, cats, cattle, dogs, flying foxes, horses, humans, macropods,  
650 possums (namely Brushtail possums *Trichosurus vulpecula*), rats, rabbits, and sheep. We consider the im-  
651 portance of the following mosquito species: *Aedes notoscriptus*, *Ae. procax*, *Ae. vigilax*, *Coquillettidia linealis*,  
652 *Culex annulirostris*, *Cx. australicus*, *Cx. quinquefasciatus*, *Cx. sitiens*, *Verrallina funerea*, and *Mansonia uniformis*.

### 653 **Multi-generation approximation**

654 To approximate how RRV would spread in a community over the course of an epidemic we used the next-  
655 generation matrix (NGM) approach to calculate the progression of the disease in a fully susceptible popu-  
656 lation in discrete time steps where each time step represents a full cycle of transmission (which spans the  
657 infectious period of hosts plus the survival period of mosquitoes). To do so, we first calculated the number  
658 of hosts of each species that would become infected starting with a single infected host individual of one  
659 species using  $\mathbf{G}_{HH}$ . To calculate which hosts would become infected in the next generation, we then used  
660  $\mathbf{G}_{HH}$  once again, but this time starting with the individuals infected from the previous step. We repeated  
661 this process over five generations. To estimate how infection spreads in the mosquito community we used  
662 a similar approach, but instead started with one infected mosquito and used  $\mathbf{G}_{VV}$ . Though this strategy  
663 provides a coarse approximation of transmission over time because of the time span of each discrete time  
664 step (relative to continuous-time differential equation model, for example), it is useful for revealing impor-  
665 tant pathways of transmission and identifying species that remain important transmitters over multiple  
666 generations.

## 667 **Acknowledgements**

668 We thank the Mordecai and McCallum labs for feedback on model construction and our presentation of  
669 results. We further thank the Mordecai lab for feedback on our first draft of the manuscript. We thank Leon  
670 Hugo (QIMR) for advice relating to vertebrate titre profiles, John Mackenzie for advice on human titres,  
671 Charles El-Hage for advice on horse populations, and Cameron Webb for advice on mosquito ecology.  
672 Finally, we thank the Brisbane City Council for mosquito abundance data. EAM was supported by the  
673 National Science Foundation and the Fogarty International Center (DEB-1518681 and DEB-2011147), the  
674 King Center for Global Development, and the Terman Award. EAM, MPK, and EBS were supported by  
675 the National Institute of General Medical Sciences (R35GM133439). MPK was supported by the Natural  
676 Capital Project. AVDH states that: “The opinions, interpretations and conclusions are those of the author  
677 and do not necessarily represent those of the organization”

## 678 **Competing Interests**

679 The authors declare no competing interests.

## 680 **Data Availability**

681 All data and code used in this study are available in the online supplemental material. Code is also hosted  
682 at: [https://github.com/morgankain/RRV\\_HostVectorCompetence](https://github.com/morgankain/RRV_HostVectorCompetence).

## References

- Aaskov, J., J. Mataika, G. Lawrence, V. Rabukawaqa, M. Tucker, J. Miles, and D. Dalglis, 1981. An epidemic of Ross River virus infection in Fiji, 1979. *The American journal of tropical medicine and hygiene* 30(5), 1053–1059.
- Allan, B. F., R. B. Langerhans, W. A. Ryberg, W. J. Landesman, N. W. Griffin, R. S. Katz, B. J. Oberle, M. R. Schutzenhofer, K. N. Smyth, A. d. S. Maurice, L. Clark, K. R. Crooks, D. E. Hernandez, R. G. McLean, R. S. Ostfeld, and J. M. Chase, 2009. Ecological correlates of risk and incidence of West Nile virus in the United States. *Oecologia* 158(4), 699–708.
- Anderson, R. M. and R. M. May, 1985. *Helminth Infections of Humans: Mathematical Models, Population Dynamics, and Control*, Volume 24 of *Advances in Parasitology*, pp. 1–101.
- Andreadis, T. G., J. F. Anderson, C. R. Vossbrinck, and A. J. Main, 2004. Epidemiology of West Nile virus in Connecticut: a five-year analysis of mosquito data 1999–2003. *Vector-Borne & Zoonotic Diseases* 4(4), 360–378.
- Ashford, R. W., 1997. What it takes to be a reservoir host. *Belgian Journal of Zoology (Belgium)*.
- Australian Govt. Dept. of Health, 2020. National Notifiable Diseases Surveillance System (NNDSS). <http://www9.health.gov.au/cda/source/cda-index.cfm>.
- Ayres, C. F., 2016. Identification of Zika virus vectors and implications for control. *The Lancet Infectious Diseases* 16(3), 278–279.
- Ballard, J. and I. D. Marshall, 1986. An investigation of the potential of *Aedes camptorhynchus* (Thom.) as a vector of Ross River virus. *Australian Journal of Experimental Biology and Medical Science* 64(2), 197–200.
- Bates, D., M. Mächler, B. Bolker, and S. Walker, 2015. Fitting linear mixed-effects models using lme4. *Journal of Statistical Software* 67(1), 1–48.
- Becker, D. J., S. N. Seifert, and C. J. Carlson, 2020. Beyond infection: Integrating competence into reservoir host prediction. *Trends in Ecology & Evolution* 35(12), 1062–1065.
- Beier, J. C., 2002. *Vector incrimination and entomological inoculation rates*, pp. 3–11. *Malaria Methods and Protocols*. New York: Springer.
- Borlase, A., J. P. Webster, and J. W. Rudge, 2018. Opportunities and challenges for modelling epidemiological and evolutionary dynamics in a multihost, multiparasite system: Zoonotic hybrid schistosomiasis in West Africa. *Evolutionary Applications* 11(4), 501–515.
- Boyd, A. and B. Kay, 2002. Assessment of the potential of dogs and cats as urban reservoirs of Ross River and Barmah Forest viruses. *Australian Veterinary Journal* 80(1-2), 83–86.
- Boyd, A. M., R. A. Hall, R. T. Gemmell, and B. H. Kay, 2001. Experimental infection of Australian brushtail possums, *Trichosurus vulpecula* (Phalangeridae: Marsupialia), with Ross River and Barmah Forest viruses by use of a natural mosquito vector system. *The American Journal of Tropical Medicine and Hygiene* 65(6), 777–782.
- Brown, H. E., M. Paladini, R. A. Cook, D. Kline, D. Barnard, and D. Fish, 2014. Effectiveness of mosquito traps in measuring species abundance and composition. *Journal of medical entomology* 45(3), 517–521.
- Busquets, N., F. Xavier, R. Martín-Folgar, G. Lorenzo, I. Galindo-Cardiel, B. P. Del Val, R. Rivas, J. Iglesias, F. Rodríguez, D. Solanes, M. Domingo, and A. Brun, 2010. Experimental infection of young adult European breed sheep with Rift Valley fever virus field isolates. *Vector-Borne and Zoonotic Diseases* 10(7), 689–696.
- Carlson, J. S., E. Walther, R. TroutFryxell, S. Staley, L. A. Tell, R. N. Sehgal, C. M. Barker, and A. J. Cornel, 2015. Identifying avian malaria vectors: sampling methods influence outcomes. *Parasites & Vectors* 8(1), 365.

- Carpenter, B., A. Gelman, M. D. Hoffman, D. Lee, B. Goodrich, M. Betancourt, M. Brubaker, J. Guo, P. Li, and A. Riddell, 2017. Stan: A probabilistic programming language. *Journal of Statistical Software* 76(1).
- Carver, S., H. Spafford, A. Storey, and P. Weinstein, 2009. Dryland salinity and the ecology of Ross River virus: the ecological underpinnings of the potential for transmission. *Vector-Borne and Zoonotic Diseases* 9(6), 611–622.
- Childs, M. L., N. Nova, J. Colvin, and E. A. Mordecai, 2019. Mosquito and primate ecology predict human risk of yellow fever virus spillover in Brazil. *Philosophical Transactions of the Royal Society B* 374(1782), 20180335.
- Clafflin, S. B. and C. E. Webb, 2015. Ross River virus: many vectors and unusual hosts make for an unpredictable pathogen. *PLoS Pathog* 11(9), e1005070.
- Cleaveland, S. and C. Dye, 1995. *Rabies in the Serengeti: the role of domestic dogs and wildlife in maintenance of disease*, pp. 112–118. Proceedings of the third international conference of the southern and eastern African rabies group.
- Davies, F. and L. Karstad, 1981. Experimental infection of the African buffalo with the virus of Rift Valley fever. *Tropical Animal Health and Production* 13(1), 185–188.
- de Almeida, M. A., E. Dos Santos, J. d. C. Cardoso, L. G. da Silva, R. M. Rabelo, and J. C. Bicca-Marques, 2019. Predicting yellow fever through species distribution modeling of virus, vector, and monkeys. *Eco-Health* 16(1), 95–108.
- de Camargo-Neves, V. L., D. W. Poletto, L. A. Rodas, M. L. Pachioli, R. P. Cardoso, S. A. Scandar, S. M. Sampaio, P. H. Koyanagui, M. V. Botti, L. F. Mucci, and A. de C. Gomes, 2005. Entomological investigation of a sylvatic yellow fever area in São Paulo State, Brazil. *Cadernos de Saude Publica* 21(4), 1278–1286.
- DeFoliart, G., P. Grimstad, and D. Watts, 1987. Advances in mosquito-borne arbovirus/vector research. *Annual Review of Entomology* 32(1), 479–505.
- Denholm, L., N. J. Beeton, L. K. Forbes, and S. Carver, 2017. A model for the dynamics of Ross River virus in the Australian environment. *Letters in Biomathematics* 4(1), 187–206.
- Diekmann, O., J. A. P. Heesterbeek, and J. A. Metz, 1990. On the definition and the computation of the basic reproduction ratio  $R_0$  in models for infectious diseases in heterogeneous populations. *Journal of Mathematical Biology* 28(4), 365–382.
- Dobson, A., 2004. Population dynamics of pathogens with multiple host species. *The American Naturalist* 164(S5), S64–S78.
- Doggett, S., M. Klowliden, and R. Russell, 2001. Are vector competence experiments competent vector experiments. *Arbovirus Res Aust* 8, 126–130.
- Doggett, S. and R. Russell, 1997. *Aedes notoscriptus* can transmit inland and coastal isolates of Ross River and Barmah Forest viruses from New South Wales. *Arbovirus Res Aust* 7, 79–81.
- Doherty, R., H. Standfast, R. Domrow, E. Wetters, R. Whitehead, and J. Carley, 1971. Studies of the epidemiology of arthropod-borne virus infections at Mitchell River Mission, Cape York Peninsula, North Queensland IV. Arbovirus infections of mosquitoes and mammals, 1967–1969. *Transactions of the Royal Society of Tropical Medicine and Hygiene* 65(4), 504–513.
- Doherty, R. L., B. Gorman, R. Whitehead, and J. Carley, 1966. Studies of arthropod-borne virus infections in Queensland: V. Survey of antibodies to group A arboviruses in man and other animals. *Australian Journal of Experimental Biology and Medical Science* 44(4), 365–378.
- Donnelly, B., L. Berrang-Ford, N. A. Ross, and P. Michel, 2015. A systematic, realist review of zooprophylaxis for malaria control. *Malaria journal* 14(1), 313.

- Duong, V., L. Lambrechts, R. E. Paul, S. Ly, R. S. Lay, K. C. Long, R. Huy, A. Tarantola, T. W. Scott, A. Sakuntabhai, and P. Buchy, 2015. Asymptomatic humans transmit dengue virus to mosquitoes. *Proceedings of the National Academy of Sciences* 112(47), 14688–14693.
- El-Hage, C. M., N. J. Bamford, J. R. Gilkerson, and S. E. Lynch, 2020. Ross River virus infection of horses: Appraisal of ecological and clinical consequences. *Journal of Equine Veterinary Science* 93, 103143.
- Faddy, H., M. Dunford, C. Seed, A. Olds, D. Harley, M. Dean, V. Racloz, S. McCarthy, D. Smith, and R. Flower, 2015. Seroprevalence of antibodies to Ross River and Barmah Forest viruses: Possible implications for blood transfusion safety after extreme weather events. *EcoHealth* 12(2), 347–353.
- Fanning, I., P. Mottram, and B. Kay, 1992. Studies on vector competence and autogeny in *Culex sitiens* Wiedemann (Diptera: Culicidae). *Australian Journal of Entomology* 31(3), 249–253.
- Ferraguti, M., H. Heesterbeek, J. Martínez-de la Puente, M. Á. Jiménez-Clavero, A. Vázquez, S. Ruiz, F. Llorente, D. Roiz, H. Vernooij, R. Soriguer, and J. Figuerola, 2020. The role of different *Culex* mosquito species in the transmission of West Nile virus and avian malaria parasites in Mediterranean areas. *Transboundary and Emerging Diseases*.
- Flies, E. J., C. L. Lau, S. Carver, and P. Weinstein, 2018. Another emerging mosquito-borne disease? Endemic Ross River virus transmission in the absence of marsupial reservoirs. *BioScience* 68(4), 288–293.
- Gora, D., T. Yaya, T. Jocelyn, F. Didier, D. Maoulouth, S. Amadou, T. D. Ruel, and J. P. Gonzalez, 2000. The potential role of rodents in the enzootic cycle of Rift Valley fever virus in Senegal. *Microbes and infection* 2(4), 343–346.
- Gürtler, R. E. and M. V. Cardinal, 2015. Reservoir host competence and the role of domestic and commensal hosts in the transmission of *Trypanosoma cruzi*. *Acta tropica* 151, 32–50.
- Harley, D., A. Sleight, and S. Ritchie, 2001. Ross River virus transmission, infection, and disease: a cross-disciplinary review. *Clinical microbiology reviews* 14(4), 909–932.
- Hartemink, N., B. Purse, R. Meiswinkel, H. E. Brown, A. De Koeijer, A. Elbers, G. Boender, D. Rogers, and J. Heesterbeek, 2009. Mapping the basic reproduction number  $R_0$  for vector-borne diseases: a case study on bluetongue virus. *Epidemics* 1(3), 153–161.
- Haydon, D. T., S. Cleaveland, L. H. Taylor, and M. K. Laurenson, 2002. Identifying reservoirs of infection: a conceptual and practical challenge. *Emerging infectious diseases* 8(12), 1468–1473.
- Huang, Z. Y., W. F. de Boer, F. van Langevelde, V. Olson, T. M. Blackburn, and H. H. Prins, 2013. Species' life-history traits explain interspecific variation in reservoir competence: a possible mechanism underlying the dilution effect. *PLoS One* 8(1), e54341.
- Jansen, A. M., S. C. das Chagas Xavier, and A. L. R. Roque, 2018. *Trypanosoma cruzi* transmission in the wild and its most important reservoir hosts in Brazil. *Parasites & Vectors* 11(1), 502.
- Jansen, C. C., M. A. Shivas, F. J. May, A. T. Pyke, M. B. Onn, K. Lodo, S. Hall-Mendelin, J. L. McMahon, B. L. Montgomery, J. M. Darbro, S. L. Doggett, and A. F. van den Hurk, 2019. Epidemiologic, entomologic, and virologic factors of the 2014–15 Ross River virus outbreak, Queensland, Australia. *Emerging Infectious Diseases* 25(12), 2243.
- Jansen, C. C., C. E. Webb, G. C. Graham, S. B. Craig, P. Zborowski, S. A. Ritchie, R. C. Russell, and A. F. Van den Hurk, 2009. Blood sources of mosquitoes collected from urban and peri-urban environments in eastern Australia with species-specific molecular analysis of avian blood meals. *The American journal of tropical medicine and hygiene* 81(5), 849–857.
- Jansen, C. C., C. R. Williams, and A. F. Van Den Hurk, 2015. The usual suspects: comparison of the relative roles of potential urban chikungunya virus vectors in Australia. *PLoS One* 10(8), e0134975.

- Jeffery, J. A., B. H. Kay, and P. A. Ryan, 2006. Role of *Verrallina funerea* (Diptera: Culicidae) in transmission of Barmah Forest virus and Ross River virus in coastal areas of eastern Australia. *Journal of medical entomology* 43(6), 1239–1247.
- Jeffery, J. A., P. A. Ryan, S. A. Lyons, and B. H. Kay, 2002. Vector competence of *Coquillettidia linealis* (Skuse)(Diptera: Culicidae) for Ross River and Barmah Forest viruses. *Australian Journal of Entomology* 41(4), 339–344.
- Jennings, C. and B. Kay, 1999. Dissemination barriers to Ross River virus in *Aedes vigilax* and the effects of larval nutrition on their expression. *Medical and veterinary entomology* 13(4), 431–438.
- Johnson, P. and D. Thielges, 2010. Diversity, decoys and the dilution effect: how ecological communities affect disease risk. *Journal of Experimental Biology* 213(6), 961–970.
- Jupp, P. G. and A. Kemp, 2002. Laboratory vector competence experiments with yellow fever virus and five South African mosquito species including *Aedes aegypti*. *Transactions of the Royal Society of Tropical Medicine and Hygiene* 96(5), 493–498.
- Kahl, O., L. Gern, L. Eisen, and R. S. Lane, 2002. *Ecological research on Borrelia burgdorferi sensu lato: terminology and some methodological pitfalls*, pp. 29–46. Lyme borreliosis: biology, epidemiology and control. New York: CABI Publishing.
- Kain, M. P. and B. M. Bolker, 2019. Predicting West Nile virus transmission in North American bird communities using phylogenetic mixed effects models and ebird citizen science data. *Parasites & Vectors* 12(1), 395.
- Kaul, R. B., M. V. Evans, C. C. Murdock, and J. M. Drake, 2018. Spatio-temporal spillover risk of yellow fever in Brazil. *Parasites & Vectors* 11(1), 488.
- Kay, B., 1982. Three modes of transmission of Ross River virus by *Aedes vigilax* (Skuse). *Australian Journal of Experimental Biology and Medical Science* 60(3), 339–344.
- Kay, B., J. Carley, I. Fanning, and C. Filippich, 1979. Quantitative studies of the vector competence of *Aedes aegypti*, *Culex annulirostris* and other mosquitoes (Diptera: Culicidae) with Murray Valley encephalitis and other Queensland arboviruses. *Journal of medical entomology* 16(1), 59–66.
- Kay, B., I. Fanning, and J. Carley, 1982a. Vector competence of *Culex pipiens quinquefasciatus* for Murray Valley encephalitis, Kunjin, and Ross River viruses from Australia. *The American Journal of Tropical Medicine and Hygiene* 31(4), 844–848.
- Kay, B., I. Fanning, and J. Carley, 1982b. Vector competence of *Culex pipiens quinquefasciatus* for Murray Valley encephalitis, Kunjin, and Ross River viruses from Australia. *The American Journal of Tropical Medicine and Hygiene* 31(4), 844–848.
- Kay, B., R. Hall, I. Fanning, P. Mottram, P. Young, and C. Pollitt, 1986. Experimental infection of vertebrates with Murray Valley encephalitis and Ross River viruses. *Arbovirus Res. Aust* 4, 71–75.
- Kay, B. and C. Jennings, 2002. Enhancement or modulation of the vector competence of *Ochlerotatus vigilax* (Diptera: Culicidae) for Ross River virus by temperature. *Journal of medical entomology* 39(1), 99–105.
- Kay, B. and A. JG, 1989. Ross River virus (epidemic polyarthritis). *The Arboviruses: Epidemiology and Ecology* 4, 93–112.
- Kay, B. H., A. M. Boyd, P. A. Ryan, and R. A. Hall, 2007. Mosquito feeding patterns and natural infection of vertebrates with Ross River and Barmah Forest viruses in Brisbane, Australia. *The American journal of tropical medicine and hygiene* 76(3), 417–423.
- Kay, B. H., T. M. Watson, and P. A. Ryan, 2008. Definition of productive *Aedes notoscriptus* (Diptera: Culicidae) habitats in western Brisbane, and a strategy for their control. *Australian Journal of Entomology* 47(2), 142–148.



- Keesing, F., M. H. Hersh, M. Tibbetts, D. J. McHenry, S. Duerr, J. Brunner, M. Killilea, K. LoGiudice, K. A. Schmidt, and R. S. Ostfeld, 2012. Reservoir competence of vertebrate hosts for *Anaplasma phagocytophilum*. *Emerging Infectious Diseases* 18(12), 2013.
- Killick-Kendrick, R., 1990. Phlebotomine vectors of the leishmaniases: a review. *Medical and Veterinary Entomology* 4(1), 1–24.
- Kilpatrick, A. M., L. D. Kramer, S. R. Campbell, E. O. Alleyne, A. P. Dobson, and P. Daszak, 2005. West Nile virus risk assessment and the bridge vector paradigm. *Emerging infectious diseases* 11(3), 425.
- Kilpatrick, A. M., S. L. LaDeau, and P. P. Marra, 2007. Ecology of West Nile virus transmission and its impact on birds in the western hemisphere. *The Auk* 124(4), 1121–1136.
- Kilpatrick, M. A., P. Daszak, M. J. Jones, P. P. Marra, and L. D. Kramer, 2006. Host heterogeneity dominates West Nile virus transmission. *Proceedings of the Royal Society B: Biological Sciences* 273(1599), 2327–2333.
- Komar, N., S. Langevin, S. Hinten, N. Nemeth, E. Edwards, D. Hettler, B. Davis, R. Bowen, and M. Bunning, 2003. Experimental infection of North American birds with the New York 1999 strain of West Nile virus. *Emerging Infectious Diseases* 9(3), 311.
- Koolhof, I. and S. Carver, 2017. Epidemic host community contribution to mosquito-borne disease transmission: Ross River virus. *Epidemiology & Infection* 145(4), 656–666.
- Kuno, G. and G.-J. J. Chang, 2005. Biological transmission of arboviruses: reexamination of and new insights into components, mechanisms, and unique traits as well as their evolutionary trends. *Clinical Microbiology Reviews* 18(4), 608–637.
- Kuno, G., J. S. Mackenzie, S. Junglen, Z. Hubálek, A. Plyusnin, and D. J. Gubler, 2017. Vertebrate reservoirs of arboviruses: myth, synonym of amplifier, or reality? *Viruses* 9(7), 185.
- Lee, V. and D. L. Moore, 1972. Vectors of the 1969 yellow fever epidemic on the Jos Plateau, Nigeria. *Bulletin of the World Health Organization* 46(5), 669.
- Levin, M. L., W. L. Nicholson, R. F. Massung, J. W. Sumner, and D. Fish, 2002. Comparison of the reservoir competence of medium-sized mammals and *Peromyscus leucopus* for *Anaplasma phagocytophilum* in Connecticut. *Vector Borne and Zoonotic Diseases* 2(3), 125–136.
- Lühken, R., W. P. Pfitzner, J. Börstler, R. Garms, K. Huber, N. Schork, S. Steinke, E. Kiel, N. Becker, E. Tannich, et al., 2014. Field evaluation of four widely used mosquito traps in Central Europe. *Parasites & Vectors* 7(1), 268.
- Marshall, I. D., G. M. Woodroffe, and G. P. Gard, 1980. Arboviruses of coastal south-eastern Australia. *Australian Journal of Experimental Biology and Medical Science* 58(1), 91–102.
- Martin, L. B., S. Burgan, J. S. Adelman, and S. S. Gervasi, 2016. Host competence: an organismal trait to integrate immunology and epidemiology. *Integrative and Comparative Biology* 56(6), 1225–1237.
- McLean, B. J., S. Hall-Mendelin, C. E. Webb, H. Bielefeldt-Ohmann, S. A. Ritchie, J. Hobson-Peters, R. A. Hall, and A. F. van den Hurk, 2021. The insect-specific Parramatta River virus is vertically transmitted by *Aedes vigilax* mosquitoes and suppresses replication of pathogenic flaviviruses *in vitro*. *Vector-Borne and Zoonotic Diseases* XX(X), XX–XX.
- Miller, B., T. Monath, W. Tabachnick, and V. Ezike, 1989. Epidemic yellow fever caused by an incompetent mosquito vector. *Trop Med Parasitol* 40(4), 396–399.
- Molaei, G., T. G. Andreadis, P. M. Armstrong, R. Bueno Jr, J. A. Dennett, S. V. Real, C. Sargent, A. Bala, Y. Randle, H. Guzman, A. Travassos da Rosa, T. Wuithiranyagool, and R. B. Tesh, 2007. Host feeding pattern of *Culex quinquefasciatus* (Diptera: Culicidae) and its role in transmission of West Nile virus in Harris County, Texas. *The American Journal of Tropical Medicine and Hygiene* 77(1), 73–81.

- Murphy, J., 2014. *An American plague: the true and terrifying story of the yellow fever epidemic of 1793*. Boston: Houghton Mifflin Harcourt.
- Nasidi, A., T. Monath, K. DeCock, O. Tomori, R. Cordellier, O. Olaleye, T. Harry, J. Adeniyi, A. Sorungbe, A. Ajose-Coker, G. van Der Laan, and A. Oyediran, 1989. Urban yellow fever epidemic in western Nigeria, 1987. *Transactions of the Royal Society of Tropical Medicine and Hygiene* 83(3), 401–406.
- Nolan, M. S., J. Schuermann, and K. O. Murray, 2013. West Nile virus infection among humans, Texas, USA, 2002–2011. *Emerging Infectious Diseases* 19(1), 137.
- Ramírez, A. L., S. Hall-Mendelin, S. L. Doggett, G. R. Hewitson, J. L. McMahon, S. A. Ritchie, and A. F. van den Hurk, 2018. Mosquito excreta: A sample type with many potential applications for the investigation of Ross River virus and West Nile virus ecology. *PLoS neglected tropical diseases* 12(8), e0006771.
- Restif, O., D. T. Hayman, J. R. Pulliam, R. K. Plowright, D. B. George, A. D. Luis, A. A. Cunningham, R. A. Bowen, A. R. Fooks, T. J. O’Shea, J. L. Wood, and C. T. Webb, 2012. Model-guided fieldwork: practical guidelines for multidisciplinary research on wildlife ecological and epidemiological dynamics. *Ecology Letters* 15(10), 1083–1094.
- Ritchie, S. A., I. D. Fanning, D. A. Phillips, H. A. Standfast, D. McGinn, and B. H. Kay, 1997. Ross River virus in mosquitoes (Diptera: Culicidae) during the 1994 epidemic around Brisbane, Australia. *Journal of Medical Entomology* 34(2), 156–159.
- Rosen, L., 1958. Experimental infection of new world monkeys with dengue and yellow fever viruses. *The American journal of tropical medicine and hygiene* 7(4), 406–410.
- Rosen, L., D. J. Gubler, and P. H. Bennett, 1981. Epidemic polyarthrits (Ross River) virus infection in the Cook Islands. *The American Journal of Tropical Medicine and Hygiene* 30(6), 1294–1302.
- Russell, R., 1995. Arboviruses and their vectors in Australia: an update on the ecology and epidemiology of some mosquito-borne arboviruses. *Rev Med Vet Entomol* 83, 141–158.
- Ryan, P., K. Do, and B. Kay, 2000. Definition of Ross River virus vectors at Maroochy shire, Australia. *Journal of medical entomology* 37(1), 146–152.
- Ryan, P. A., L. Martin, J. S. Mackenzie, and B. H. Kay, 1997. Investigation of gray-headed flying foxes (*Pteropus poliocephalus*) (Megachiroptera: Pteropodidae) and mosquitoes in the ecology of Ross River virus in Australia. *The American Journal of Tropical Medicine and Hygiene* 57(4), 476–482.
- Schenzle, D., 1984. An age-structured model of pre-and post-vaccination measles transmission. *Mathematical Medicine and Biology: A Journal of the IMA* 1(2), 169–191.
- Schmidt, K. A. and R. S. Ostfeld, 2001. Biodiversity and the dilution effect in disease ecology. *Ecology* 82(3), 609–619.
- Scott, T., 1988. *Vertebrate host ecology.*, Volume 4 of *The Arboviruses: Epidemiology and Ecology*. Boca Raton: CRC Press.
- Shanks, G. D., 2019. Could Ross River virus be the next Zika? *Journal of Travel Medicine* 26(5), taz003.
- Sharma, U. and S. Singh, 2008. Insect vectors of leishmania: distribution, physiology and their control. *Journal of Vector Borne Diseases* 45(4), 255–72.
- Shocket, M. S., S. J. Ryan, and E. A. Mordecai, 2018. Temperature explains broad patterns of Ross River virus transmission. *Elife* 7, e37762.
- Silva, E. S., C. M. Gontijo, and M. N. Melo, 2005. Criteria for an infected host to be considered a primary reservoir. *Trends in Parasitology* 12(21), 550–552.

- Skinner, E. B., A. Murphy, C. C. Jansen, M. A. Shivas, H. McCallum, M. B. Onn, S. A. Reid, and A. J. Peel, 2020. Associations between Ross River virus infection in humans and vector-vertebrate community ecology in Brisbane, Australia. *Vector-Borne and Zoonotic Diseases*.
- Skinner, E. B., P. A. Rudd, A. J. Peel, H. McCallum, S. A. Reid, and L. J. Herrero, 2020. Species traits and hotspots associated with Ross River virus infection in nonhuman vertebrates in South East Queensland. *Vector-Borne and Zoonotic Diseases*.
- Spradbrow, P. et al., 1973. Experimental infection of sheep and pigs with Ross River virus. *Australian Veterinary Journal* 49(8), 403–4.
- Stephens, C. R., C. González-Salazar, V. Sánchez-Cordero, I. Becker, E. Rebollar-Tellez, Á. Rodríguez-Moreno, M. Berzunza-Cruz, C. Domingo Balcells, G. Gutiérrez-Granados, M. Hidalgo-Mihart, C. N. Ibarra-Cerdeña, M. P. Ibarra López, L. I. Iñiguez Dávalos, and M. M. Ramírez Martínez, 2016. Can you judge a disease host by the company it keeps? Predicting disease hosts and their relative importance: a case study for Leishmaniasis. *PLoS Neglected Tropical Diseases* 10(10), e0005004.
- Stephenson, E. B., A. J. Peel, S. A. Reid, C. C. Jansen, and H. McCallum, 2018. The non-human reservoirs of Ross River virus: a systematic review of the evidence. *Parasites & Vectors* 11(1), 188.
- Tabachnick, W. J., 2013. Nature, nurture and evolution of intra-species variation in mosquito arbovirus transmission competence. *International Journal of Environmental Research and Public Health* 10(1), 249–277.
- Taylor, L. H., S. M. Latham, and M. E. Woolhouse, 2001. Risk factors for human disease emergence. *Philosophical Transactions of the Royal Society of London. Series B: Biological Sciences* 356(1411), 983–989.
- Tesh, R. B., R. G. McLean, D. A. Shroyer, C. H. Calisher, and L. Rosen, 1981. Ross river virus (togaviridae: Alphavirus) infection (epidemic polyarthritits) in American Samoa. *Transactions of the Royal Society of Tropical Medicine and Hygiene* 75(3), 426–431.
- Turell, M. J., K. J. Linthicum, L. A. Patrican, F. G. Davies, A. Kairo, and C. L. Bailey, 2008. Vector competence of selected African mosquito (diptera: Culicidae) species for Rift Valley fever virus. *Journal of Medical Entomology* 45(1), 102–108.
- Vale, T., M. Dowling, and M. Cloonan, 1992. Infection and multiplication of Ross River virus in the mosquito vector *Aedes Vigilax* (Skuse). *Australian journal of zoology* 40(1), 35–41.
- Vale, T., D. Spratt, and M. Cloonan, 1991. Serological evidence of arbovirus infection in native and domesticated mammals on the south coast of New-South-Wales. *Australian Journal of Zoology* 39(1), 1–7.
- van Doorn, H. R., 2014. Emerging infectious diseases. *Medicine* 42(1), 60–63.
- Watson, T. M. and B. H. Kay, 1998. Vector competence of *Aedes notoscriptus* (Diptera: Culicidae) for Ross River virus in Queensland, Australia. *Journal of Medical entomology* 35(2), 104–106.
- Webb, C. E., S. L. Doggett, S. A. Ritchie, and R. C. Russell, 2008. Vector competence of three Australian mosquitoes, *Verrallina carmentis*, *Verrallina lineata*, and *Mansonia septempunctata* (diptera: Culicidae), for Ross River virus. *Journal of medical entomology* 45(4), 737–740.
- Wells, P., R. Russell, M. Cloonan, L. Hueston, and M. Geary, 1994. Virus infection and vector competence of *Aedes alternans* (Westwood)(diptera: Culicidae) for Ross River virus. *Australian Journal of Entomology* 33(4), 373–375.
- Whitehead, R., 1969. Experimental infection of vertebrates with Ross River and Sindbis viruses, two group A arboviruses isolated in Australia. *Australian Journal of Experimental Biology and Medical Science* 47(1), 11–15.
- WHO Scientific Group on Arthropod-Borne and Rodent-Borne Viral Diseases, 1985. *Arthropod-borne and rodent-borne viral diseases*. Number 719.

Wichgers Schreur, P. J., L. Van Keulen, J. Kant, N. Oreshkova, R. J. Moormann, and J. Kortekaas, 2016. Co-housing of Rift Valley fever virus infected lambs with immunocompetent or immunosuppressed lambs does not result in virus transmission. *Frontiers in microbiology* 7, 287.

Wilson, A. J., E. R. Morgan, M. Booth, R. Norman, S. E. Perkins, H. C. Hauffe, N. Mideo, J. Antonovics, H. McCallum, and A. Fenton, 2017. What is a vector? *Philosophical Transactions of the Royal Society B: Biological Sciences* 372(1719), 20160085.

Woolhouse, M. E., L. H. Taylor, and D. T. Haydon, 2001. Population biology of multihost pathogens. *Science* 292(5519), 1109–1112.

## Supplemental Material for “Physiology and ecology combine to determine host and vector importance for Ross River virus and other vector-borne diseases”

Morgan P. Kain<sup>1,2\*</sup>, Eloise Skinner<sup>1\*</sup>, Andrew F. van den Hurk<sup>3</sup>, Hamish McCallum<sup>4</sup>, Erin A. Mordecai<sup>1</sup>

\*Denotes equal authorship. Corresponding authors: [morganpkain@gmail.com](mailto:morganpkain@gmail.com) (alt: [kainm@stanford.edu](mailto:kainm@stanford.edu)), [ebskinn@stanford.edu](mailto:ebskinn@stanford.edu)

<sup>1</sup>Department of Biology, Stanford University, Stanford, CA, 94305, USA

<sup>2</sup>Natural Capital Project, Woods Institute for the Environment, Stanford University, Stanford, CA 94305, USA

<sup>3</sup>Public Health Virology, Forensic and Scientific Services, Department of Health, Brisbane, Queensland, Australia

<sup>4</sup>School of Environment, Griffith University, Nathan, Queensland 4111, Australia

### Supplemental Methods

#### Vertebrate hosts: titer profiles

We converted reported means and standard deviations for peak titer and duration of detectable titer into continuous titer profiles, which are needed to translate titer into mosquito infection probability given a feeding event. For each species we first simulated  $N$  titer values at each of the first day, the day hosts reached their peak titer, and the last day of infection (where  $N$  is the total number of individuals of each species in the infection experiment that developed detectable viremia). We simulated the last day of infection and the log of peak titer for each species by drawing  $N$  samples from a Gaussian distribution using the reported means and standard deviations for infection duration and peak titer. We assumed titre on day one and the last day of infection were at a detectability threshold of  $10^{2.2}$  infectious units/ml blood (the detection limit of RRV in African green monkey kidney (Vero) cells; [McLean et al. 2021](#)), and that simulated peak titer occurred at the midpoint between the first and simulated last day of infection. We then fit a linear model in R to these simulated data using linear and quadratic terms for day post infection. To quantify uncertainty in quadratic titer profiles, we simulated and fit linear models to 1000 simulated sets of titer curves; in [Figure S<sub>m</sub>1](#) we show the 95% CI for each of the 15 hosts' quadratic profiles generated from this procedure with the raw summary values of peak and duration of titer extracted from the literature overlaid (the area under the curve for these titer profiles are shown in [Figure S<sub>m</sub>2](#)).

For human titer profiles we used data obtained during an epidemic of RRV in the Cook Islands in 1980 ([Rosen et al., 1981](#)). This study measured human titer from the day of symptom onset; raw data showed that humans experienced peak titer on day one of symptoms. To remain consistent with how we modeled non-human titer curves, we fit quadratic curves to the human titer data, which predict a peak at the first day of symptoms and that humans have detectable titer approximately three days prior to symptom onset. While it is uncertain how many days prior to symptom onset humans manifest a detectable viremic response, expert opinion on RRV (Leon Hugo and John Mackenzie *pers com*) is that it is likely *at least* one day, and for other arboviruses such as dengue, humans produce virus titers sufficient to infect mosquitoes for multiple days prior to symptom onset ([Duong et al., 2015](#)). Because our assumption of a quadratic titer curve extends titer to three days that have no direct quantitative empirical support—which results in humans having a longer duration of titer than any other host—as a conservative estimate of human physiological competence, we also run our model assuming that human titer increases from an undetectable level to a peak on day 1 of symptom onset after only a single day (instead of approximately three as predicted with the quadratic model).

#### Mosquito vectors: infection and transmission probability

In total, we gathered data for 17 experimentally infected mosquito species. In these experiments, mosquitoes were fed a given dose of RRV via an artificial blood source which contained diluted stock virus or, in limited

cases, from living organisms, such as suckling mice. The proportion that went on to become infected (RRV detected in the body) and infectious (RRV detected in the saliva measured artificially or via feeding on a susceptible vertebrate) was recorded. In the generalized linear mixed effects model (GLMM) for mosquito infection probability, we used virus dose as the sole fixed effect and modeled variation among mosquito species using a random intercept and slope over dose. For transmission probability over time, we used days since infection and dose as fixed effects and modeled variation among mosquito species' transmission over time was modeled using a random intercept and slope over times (days since feeding). While the maximum transmission probability is sometimes allowed to vary by mosquito species, we lacked the data to estimate different maxima for each species. Thus, we used simple logistic regression which models probability using an asymptote of one. Uncertainty among mosquito species (which were modeled using a random effect) were obtained from the conditional modes and conditional covariances of the random effect for species (for further details see the code available at [https://github.com/morgankain/RRV\\_HostVectorCompetence](https://github.com/morgankain/RRV_HostVectorCompetence)).

### **Mosquito vectors: feeding behavior**

We fit our multinomial model in a Bayesian context because a Bayesian model allows us to incorporate prior probabilities in order to model feeding patterns on species that were either: (A) not detected in the host survey but appear in the blood meal data; or (B) detected in the host survey but do not show up in the blood meal data. Specifically, for case (A), priors allow us to model a mosquito's feeding patterns on a species that would otherwise have an abundance of zero without having to make an arbitrary assumption about just that host species' abundance. For case (B), priors allow us to avoid the biologically implausible assumption that a mosquitoes' preference for a host that simply was not recorded in that specific blood meal survey is exactly zero. For example, in our blood meal data, zero *Culex quinquefasciatus* were recorded to have taken a blood meal from humans, though it is well understood that this species does occasionally bite humans and can lead to human infection of West Nile virus (Molaei et al., 2007).

We assume that the feeding patterns of each mosquito (proportional increases or decreases in biting host species relative to biting those species in proportion to their relative abundance) species is Gamma distributed (a flexible two-parameter distribution on  $[0, \infty)$  that can resemble an exponential distribution with mode at zero or a Gaussian-like distribution with strictly positive values) across host species. We allow the shape of this Gamma distribution to vary among mosquito species, which, in biological terms, flexibly allows our model to capture mosquitoes with specialist feeding preferences (skewed Gamma across host species—mosquitoes bite many host species rarely and a few species often) and generalist feeding tendencies (flatter Gamma—mosquitoes bite hosts in accordance with their relative abundance). To do so, we use a multi-level model in which we assume that the shape of the Gamma distributions describing each mosquito species' preference are in turn Gamma distributed (which models the distribution of mosquitoes that are specialists vs. generalists). We use a random effect structure to capture preference variation among mosquito species and to shrink estimates for species with little data to the overall mean (as given by the second of the two described Gamma distributions). To fit this model we use a Dirichlet prior, the conjugate prior to the multinomial distribution, for host abundance, which we assumed was less skewed than the distribution of detected individuals in an attempt to control for the low detection probability of more cryptic species.

## Supplemental Figures: Model Components

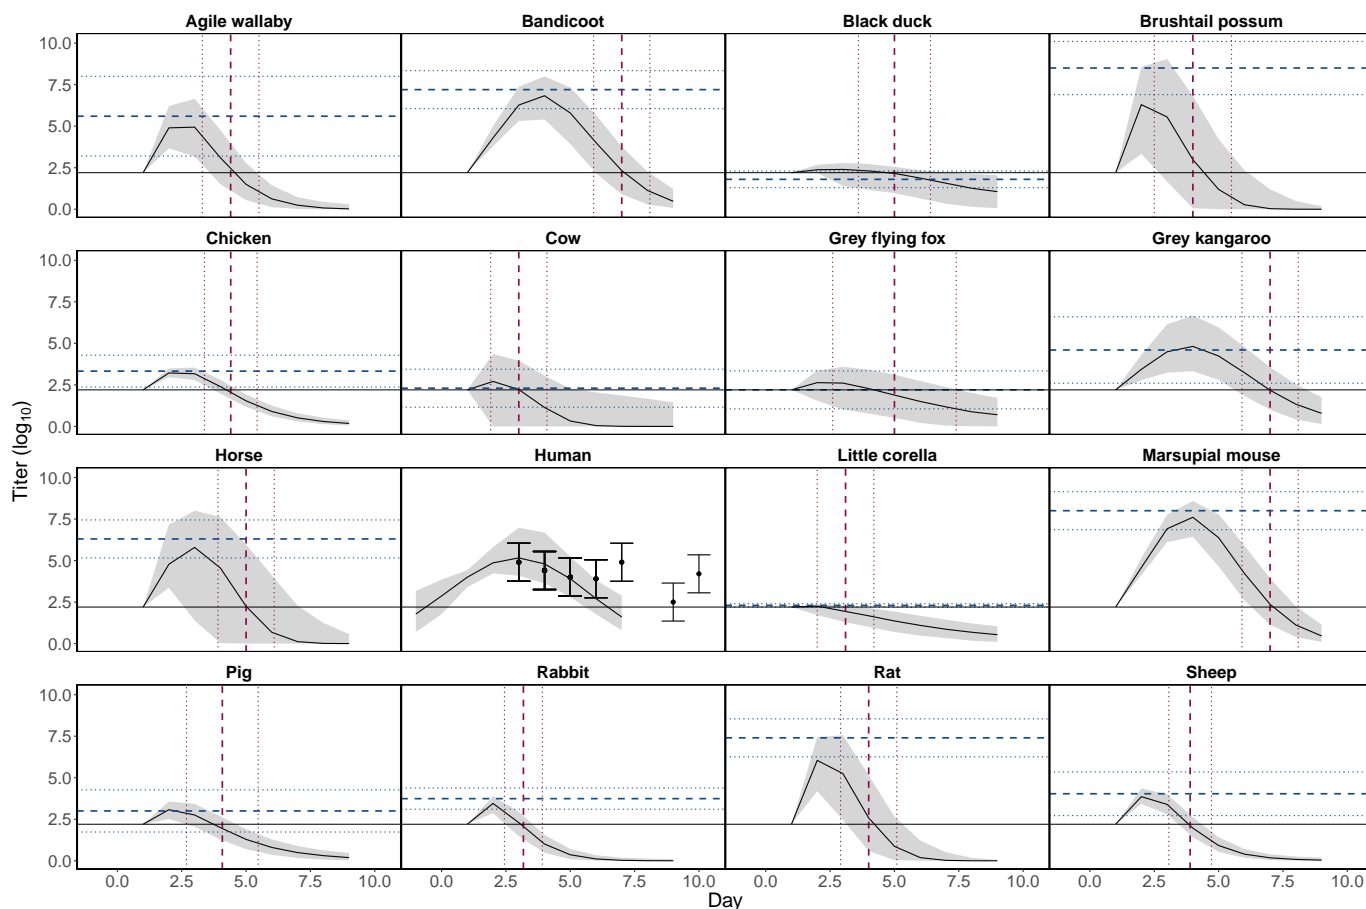

Figure S<sub>m</sub>1: **Continuous titer profiles over hosts' infectious periods constructed using empirical estimates of peak titer and titer duration.** For all non-human species 'Day' represents days since experimental exposure to Ross River virus (RRV). Solid black curves and grey envelopes show predicted medians and 95% CI calculated from all simulated titer curves. Horizontal dashed blue lines show empirically estimated peak titers for each species and horizontal dotted blue lines show  $\pm 1$  SD. Vertical dashed red lines show empirically estimated end dates of detectable titer and vertical dotted red lines show  $\pm 1$  SD. Horizontal solid black lines show the maximum detectable titer. For humans, points show reported means from raw data and error bars show  $\pm 1$  SD. The human titer data is shifted in time for visualization purposes (in the raw data the first observation of human titer is recorded on day 1 of symptoms not exposure). Our predictions for humans ignore the outlier data point pictured at day 10, but do simulate titer on days prior to empirically observed titer. For further details see commenting in the R code available at [https://github.com/morgankain/RRV\\_HostVectorCompetence](https://github.com/morgankain/RRV_HostVectorCompetence).

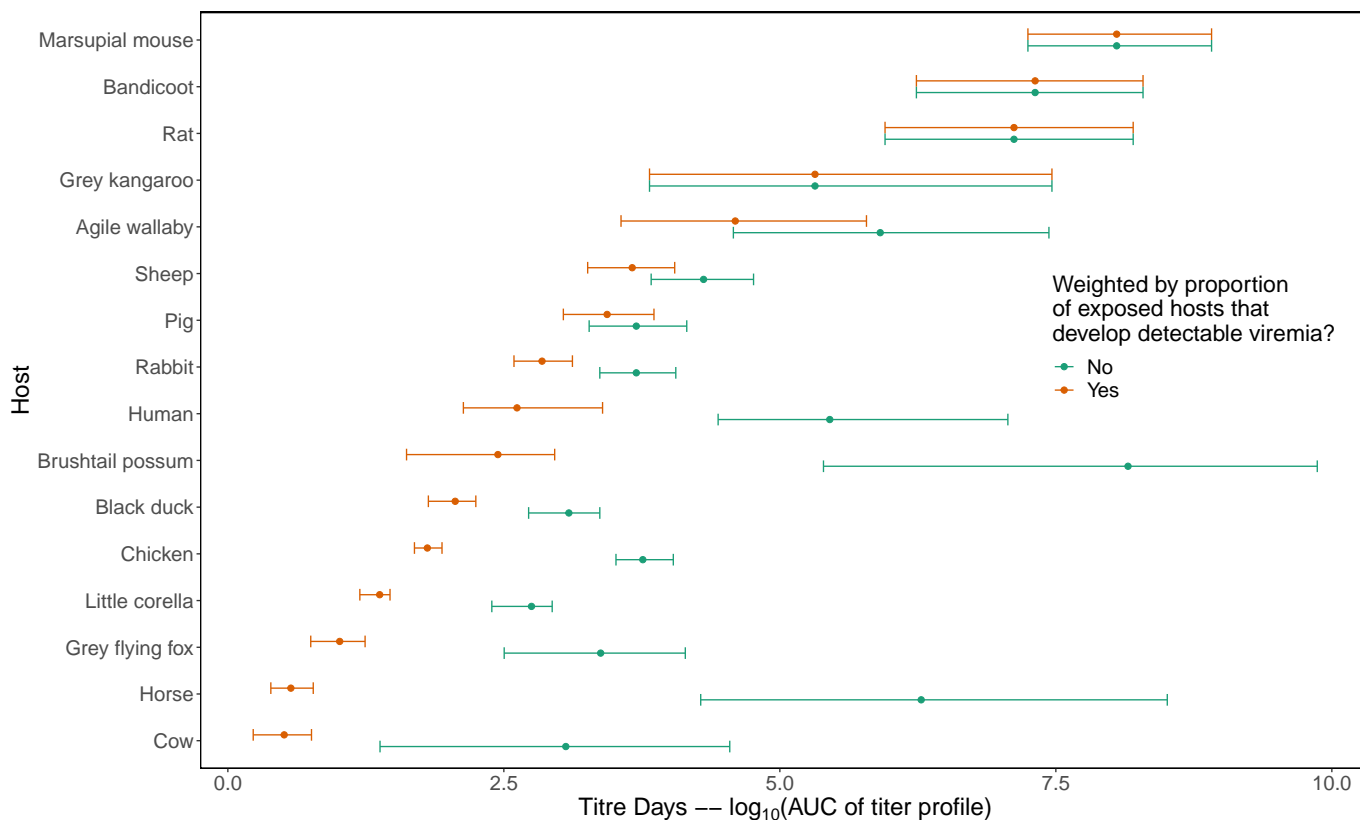

Figure S<sub>m</sub>2: Area under the curve (AUC) calculated from the host titer curves pictured in Figure S<sub>m</sub>1. Orange points and error bars (95% CI) show AUC scaled by the proportion of all individuals of each species that develop detectable viremia when exposed to virus (see Table S2 for the proportion of individuals of each species that developed a viremic response in infection experiments). Green points and error bars show AUC ignoring this condition (considering only individuals that develop viremia).



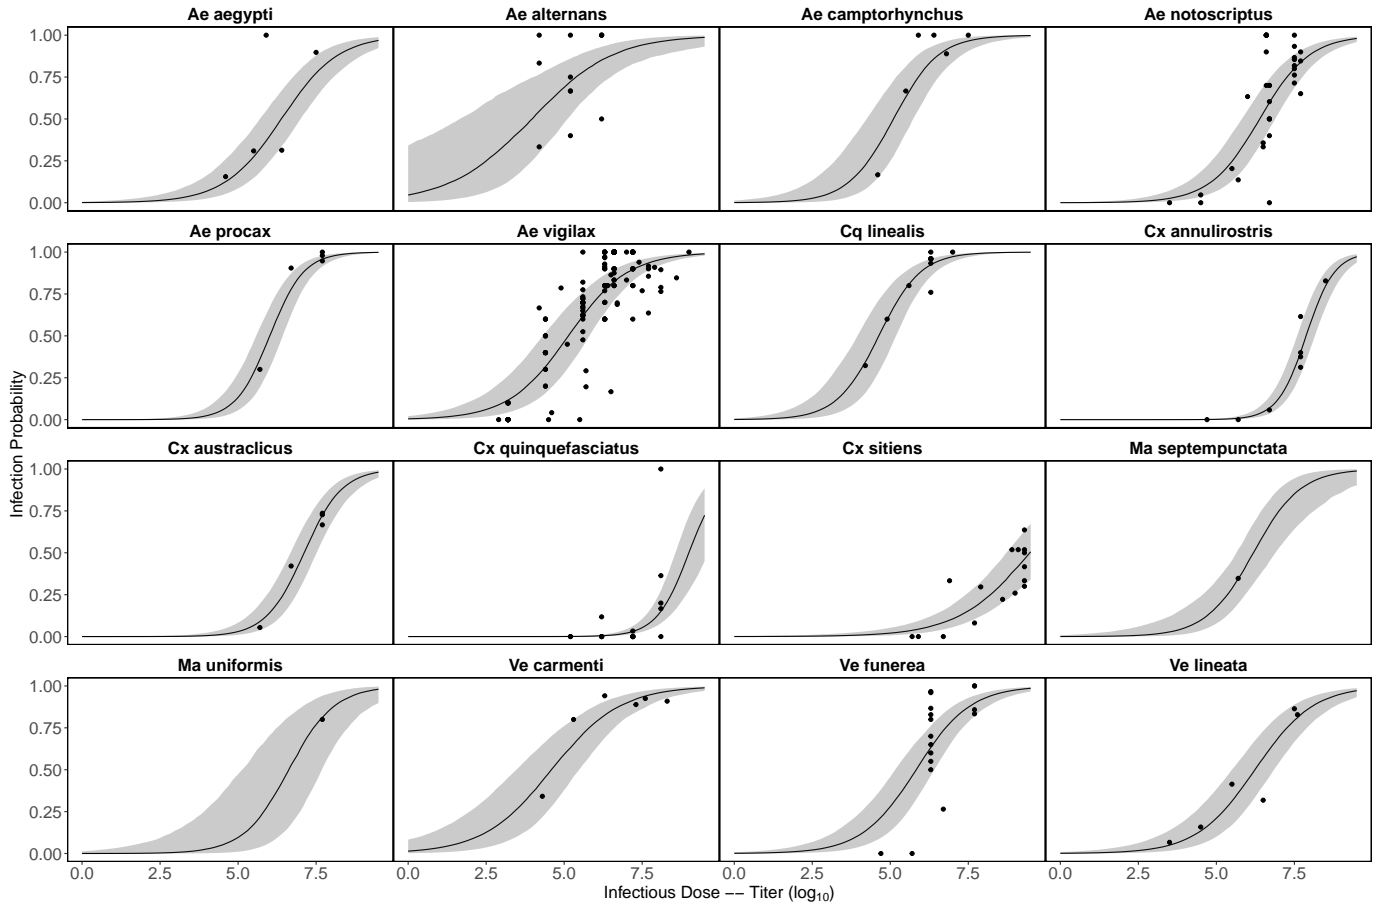

Figure S<sub>m</sub>3: **Probability mosquitoes become infected with RRV as a function of infectious dose.** Model predictions are from a binomial GLMM, with dose as a fixed effect and mosquito species as a random effect (intercept and slope over dose), which was fit in R using the package `lme4` (Bates et al., 2015). Solid black lines show predicted medians, and grey envelopes are 95% CI constructed from the conditional modes and conditional covariances of the random effect (for further details see the code available at [https://github.com/morgankain/RRV\\_HostVectorCompetence](https://github.com/morgankain/RRV_HostVectorCompetence)).

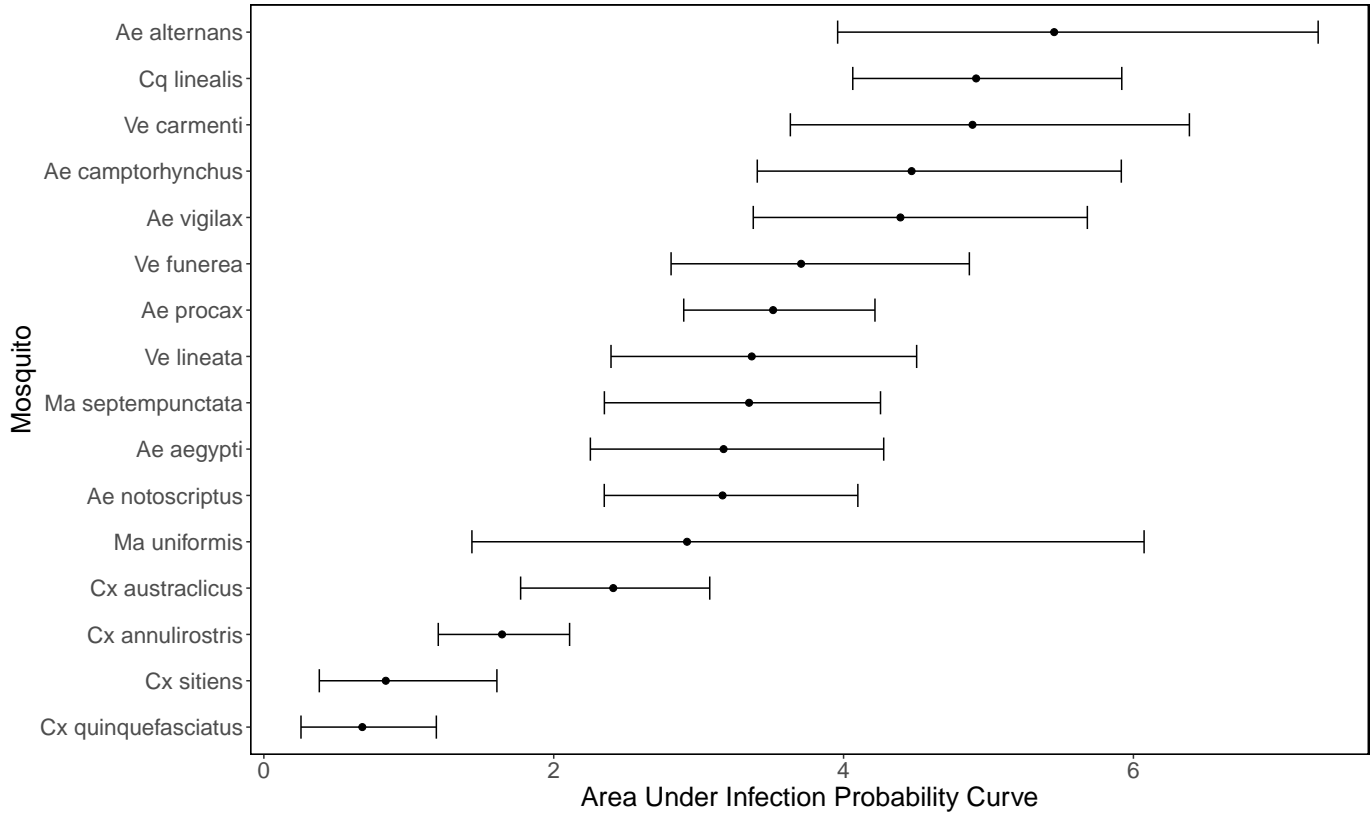

Figure S<sub>m</sub>4: Area under the curve of the mosquito infection probability curves shown in Figure S<sub>m</sub>3. Points show medians and error bars show 95% CI.

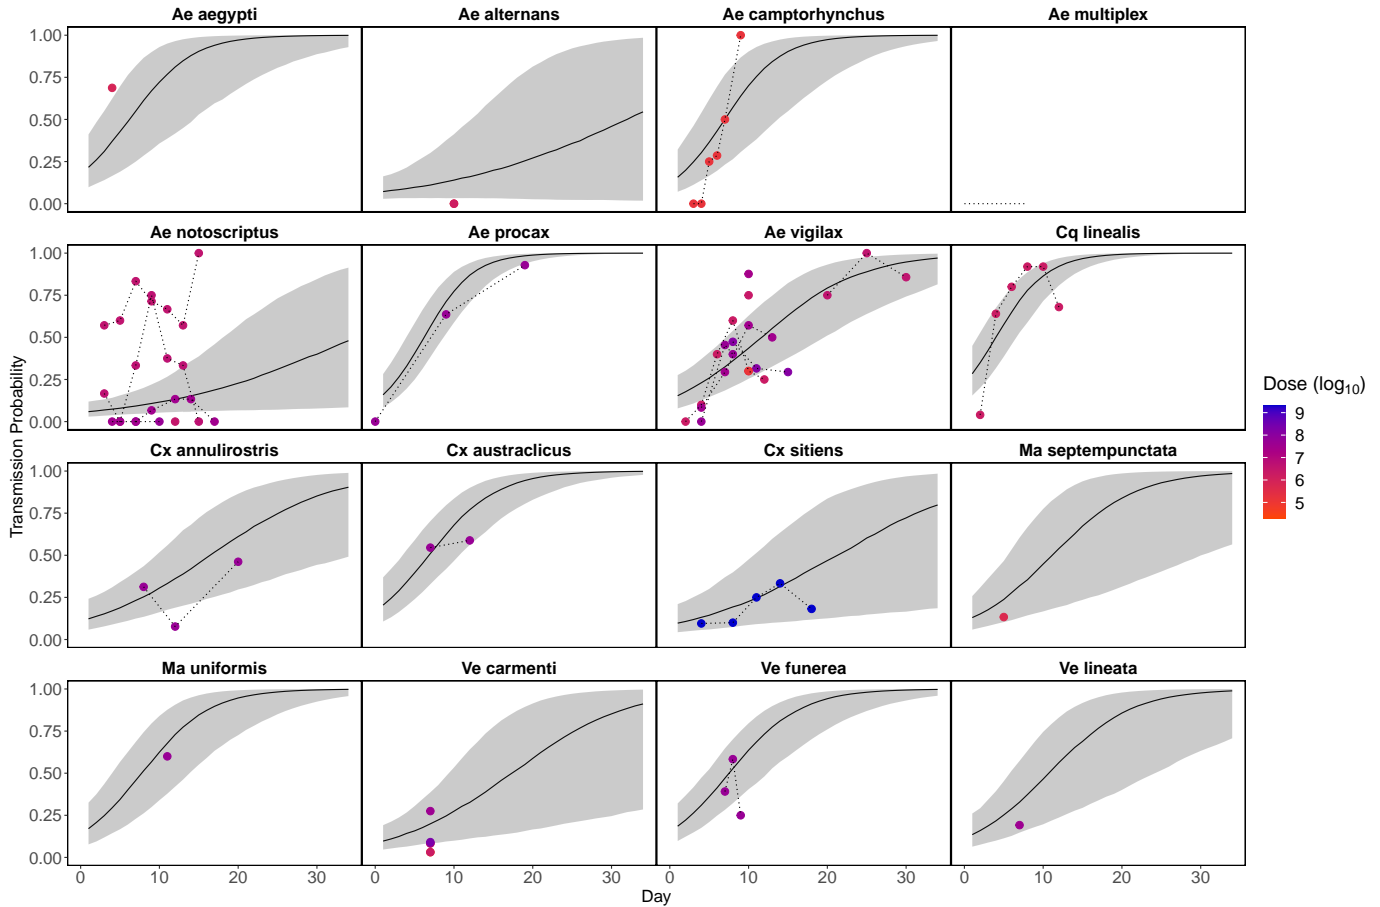

Figure S<sub>m</sub>5: **Probability over time that an infected mosquito transmits RRV to a susceptible host given a feeding event.** Model predictions are from a binomial GLMM, with day and dose as fixed effects and random effects of mosquito species (intercept and slope over day) and reference (intercept), fit in R using the package `lme4` (Bates et al., 2015). Solid black lines show predicted medians, and grey envelopes are 95% CI constructed from the conditional modes and conditional covariances of the random effect. We did not include dose as a fixed effect because of model fitting/parameter identifiability issues, but show the doses used in the laboratory experiments here. Dotted lines connect data points that are from the same experiment.

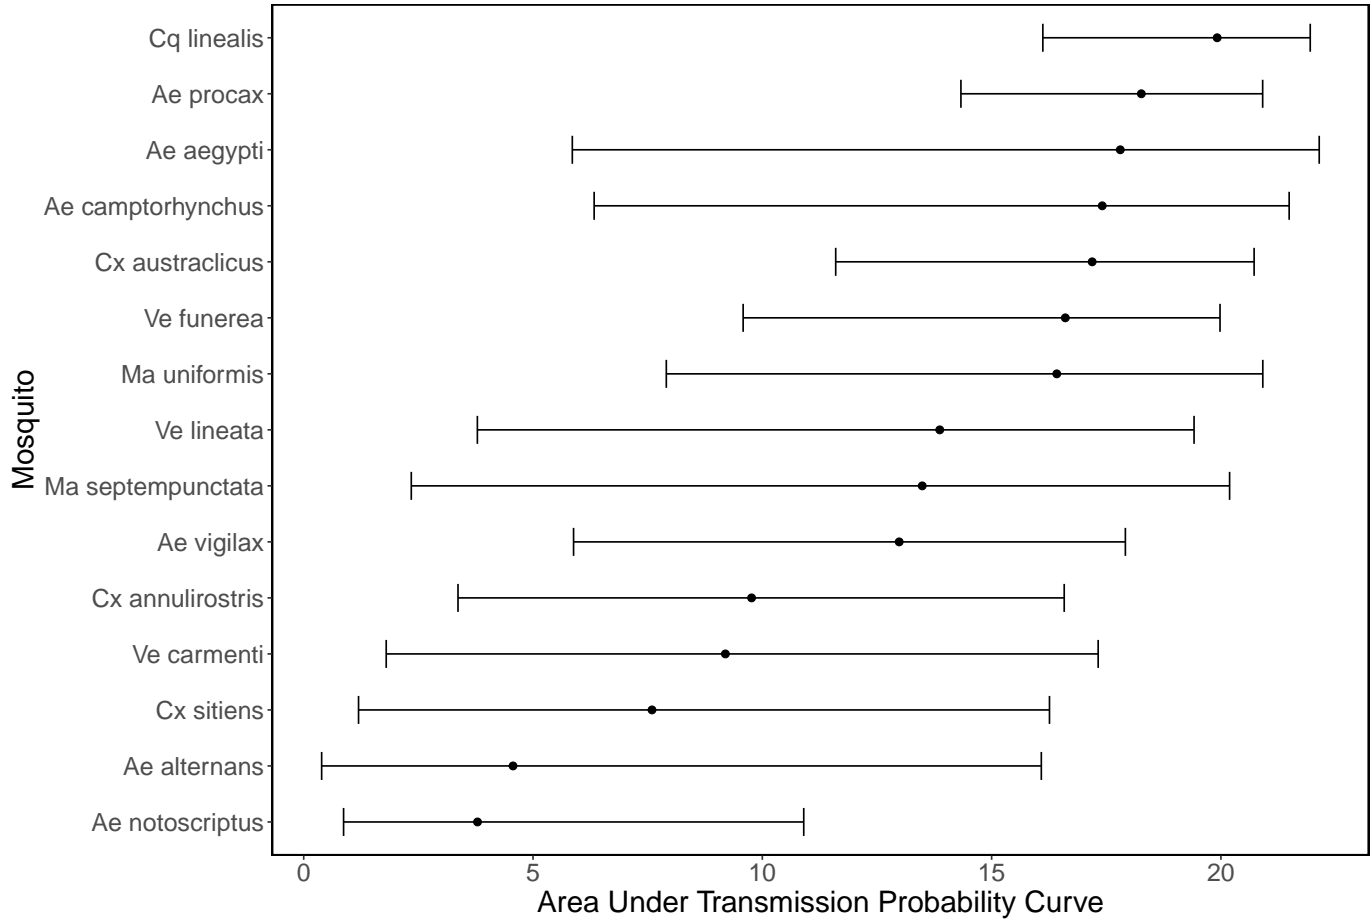

Figure S<sub>m</sub>6: Area under the curve of the mosquito transmission probability curves shown in Figure S<sub>m</sub>5. Points show medians and error bars show 95% CI. Of all mosquitoes without data just *Ve lineata* is pictured here as in Figure S<sub>m</sub>5.

### *Culex annulirostris* survival at half max of optimal laboratory conditions from Shocket et al. 2018 Elife

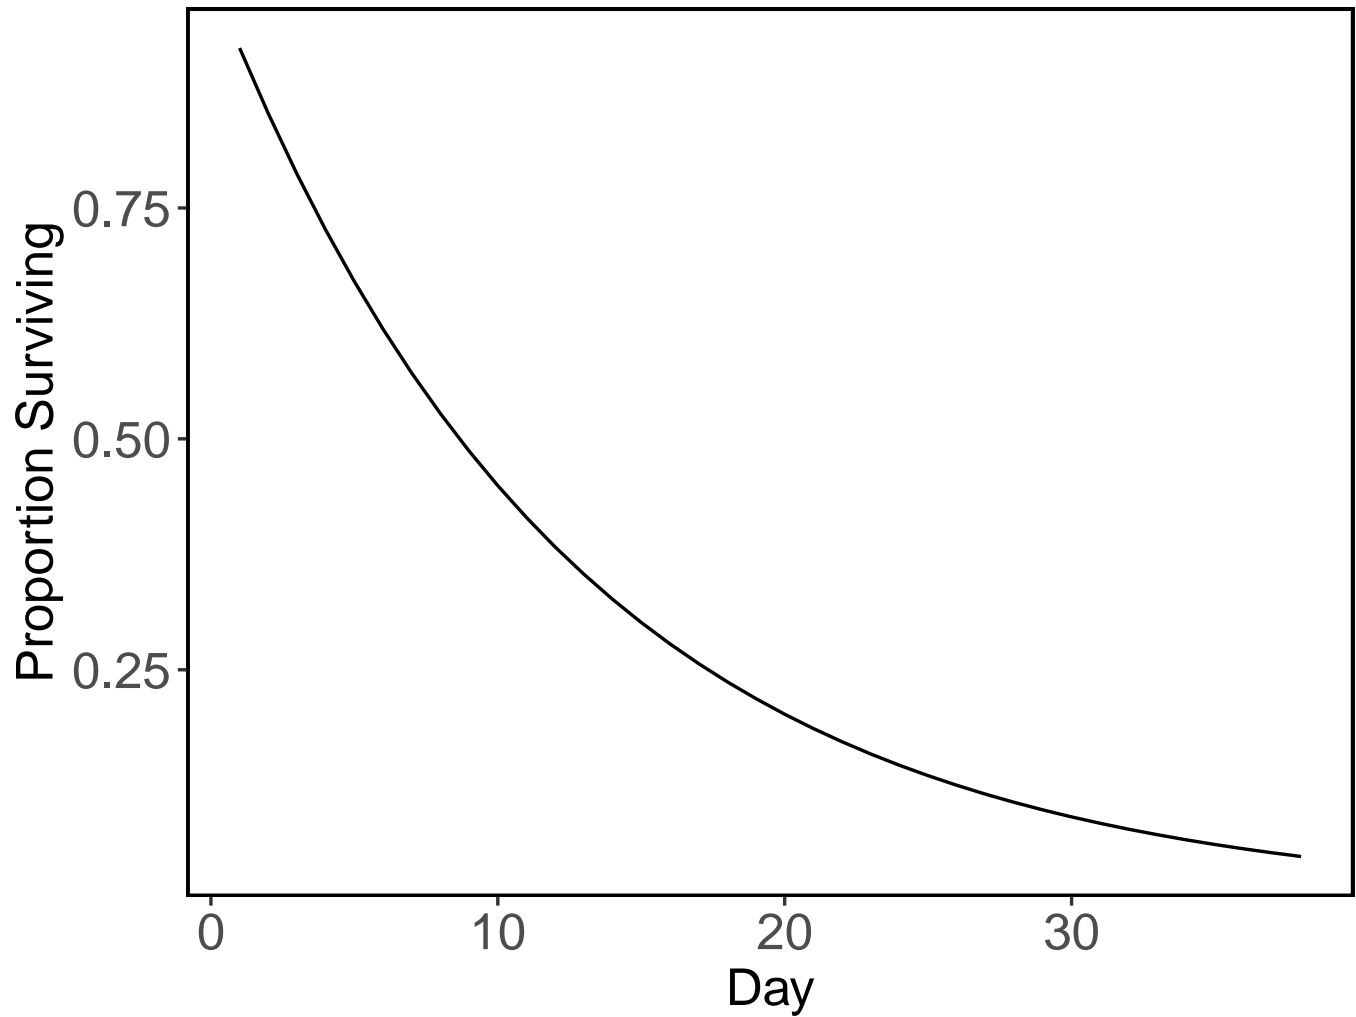

Figure S<sub>m</sub>7: *Culex annulirostris* daily survival in laboratory conditions using the half-max of survival in optimal conditions. In the absence of species-specific survival for most of our species we use this survival curve for all of the species in our model.

## Supplemental Figures: Additional Results

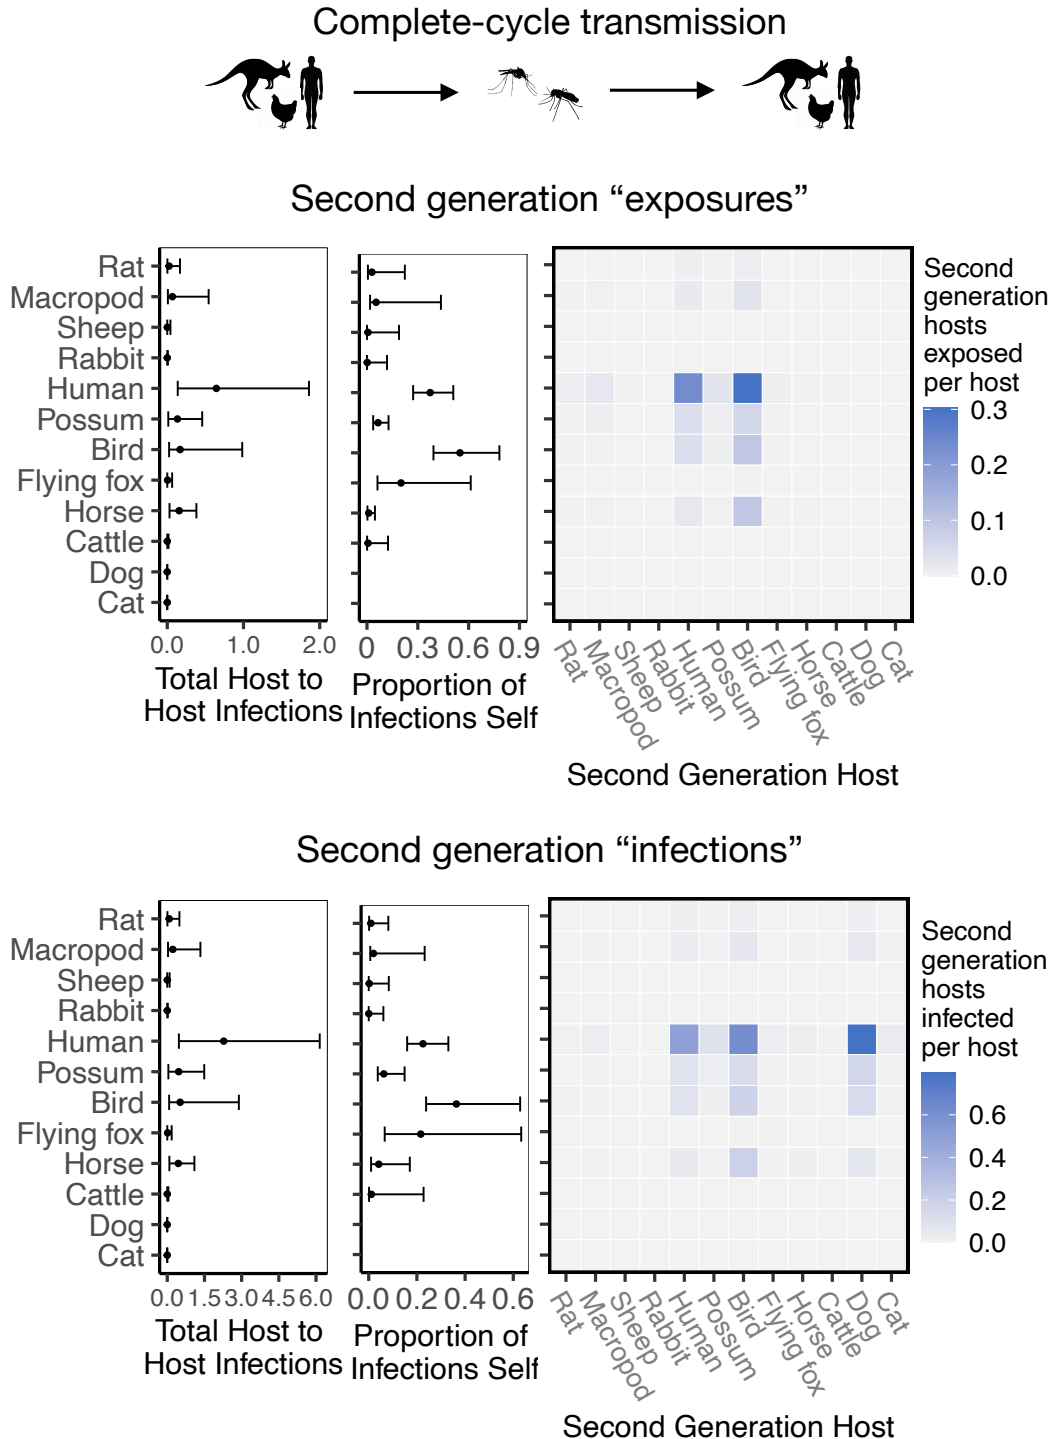

Figure S<sub>r</sub>1: RRV transmission capability of hosts as measured by the number of second generation hosts exposed to infection vs RRV transmission capability of hosts as measured by the total number of second generation hosts that mount a viremic response. The top panel is recreated from Figure 2C; the bottom row uses the same calculation for transmission but weights all second generation hosts by the proportion of those hosts that display a viremic response (i.e., dogs do not contribute to the sum in the bottom row). Though host ranks do not change depending on the method of quantifying host transmission importance, overall estimates of transmission decrease when removing sink infections (bottom panel).

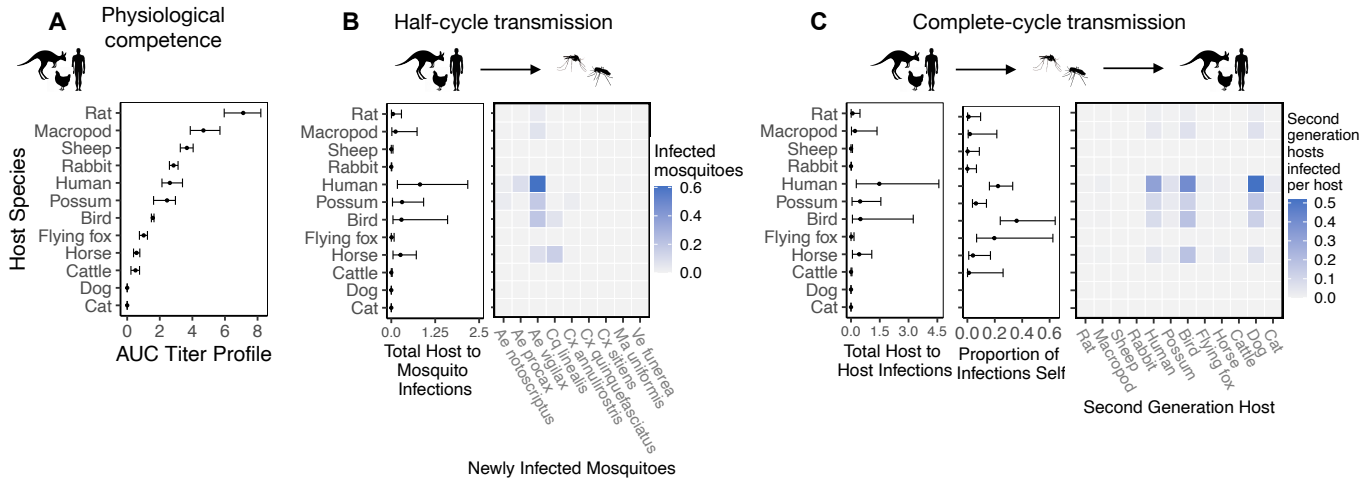

Figure S<sub>r</sub>2: **Ross River virus transmission capability of hosts based on physiological traits alone or with consideration of ecological traits that drive transmission — assuming human titer begins only 1 day prior to symptom onset instead of assuming a full quadratic titer profile as we do in the main text.** Hosts in the first column are ordered from highest (top) to lowest (bottom) by median estimates for their physiological response to experimental infection with RRV. Points show medians and error bars show 95% confidence intervals. The second column shows transmission over one half of a transmission cycle; matrices show medians for pairwise host-to-vector transmission estimates for host and vector species pairs, while the points show infection totals (sums across matrix rows) and their 95% confidence intervals (error bars). The right column shows transmission over a complete transmission cycle from the viewpoint of hosts (host-to-host transmission). As in the middle column, the matrices show medians for transmission estimates between species pairs, while the points and error bars show either sums across rows of the matrices (left plot) or the proportion of infections in the second generation that are in the same species as the original infected individual (center plot). Host species are presented in a consistent order to aid visualization of rank-order changes among panels.

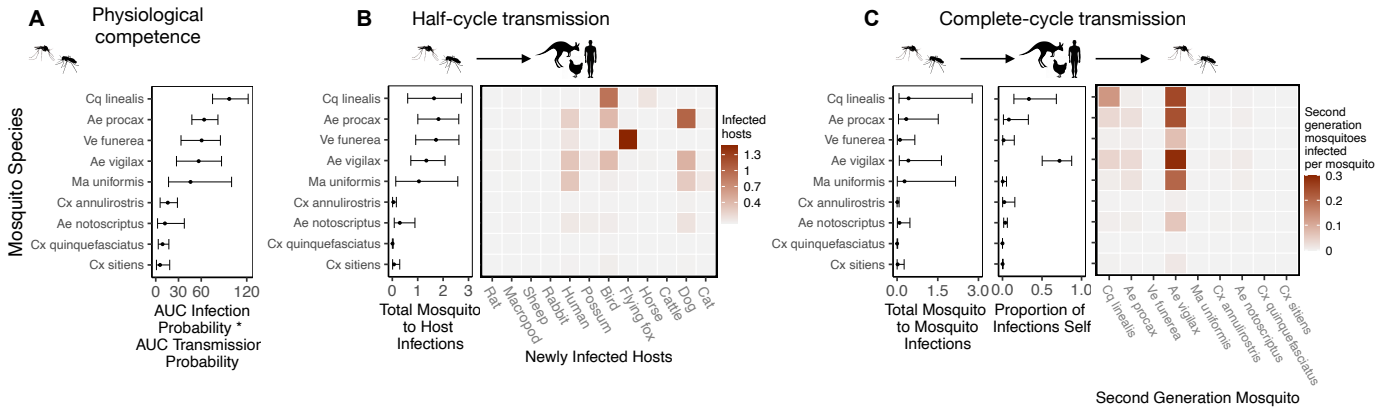

Figure S<sub>3</sub>: **Ross River virus transmission capability of mosquitoes based on physiological traits alone or with consideration of ecological traits that drive transmission — assuming human titer begins only 1 day prior to symptom onset instead of assuming a full quadratic titer profile as we do in the main text.** Mosquitoes in the first column are ordered from highest (top) to lowest (bottom) by median estimates for their physiological response to experimental infection with RRV. Points show medians and error bars show 95% confidence intervals. The second column shows transmission over one half of a transmission cycle; matrices show medians for pairwise vector-to-host transmission estimates for vector and host species pairs, while the points show infection totals (sums across matrix rows) and their 95% confidence intervals (error bars). The right column shows transmission over a complete transmission cycle from the viewpoint of mosquitoes (mosquito-to-mosquito transmission). As in the middle column, the matrices show medians for transmission estimates between species pairs, while the points and error bars show either sums across rows of the matrices (left plot) or the proportion of infections in the second generation that are in the same species as the original infected individual (center plot). Mosquito species are presented in a consistent order to aid visualization of rank-order changes among panels. Relative to [Figure 3](#), the transmission ability of *Ve. funerea* is estimated to be lower here because of the slightly reduced competence of humans.



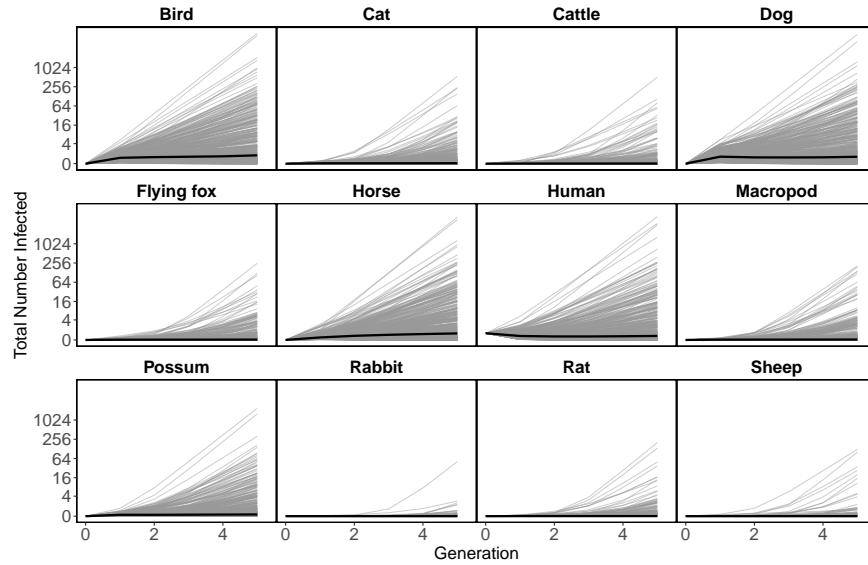

Figure S<sub>r</sub>4: **An initial human infection propagates infection through the host community.** Starting with a single infected human in generation “zero” (all hosts begin with zero infected individuals except humans), the next generation matrix approach can be used to approximate (using the time step of a generation) how an epidemic would unfold in the community. Here we show the total number of new infections of each species as the infection spreads in the community across generations beginning with the source infection in one human. In generation one, all infections arise from the source human infection. In subsequent generations, the plotted number of infections for each species is the estimated total number of infections in that species arising from all transmission pathways. Our median  $\mathcal{R}_0$  estimate for RRV transmission in Brisbane is just above one, which results in a very slow increase in cases over generations (solid lines); however, large uncertainty for the number of infections produced by each infected host and mosquito (see [Figure 2](#), [Figure 3](#)) results in the possibility of explosive epidemics and thousands of infected individual hosts after a few generations. The thin grey black lines are 500 epidemic realizations. Because we assume a fully susceptible host and vector population, this is an epidemic simulation, which would over-estimate the amount of RRV transmission in Brisbane because of the high host immunity in the host population that is ignored here.

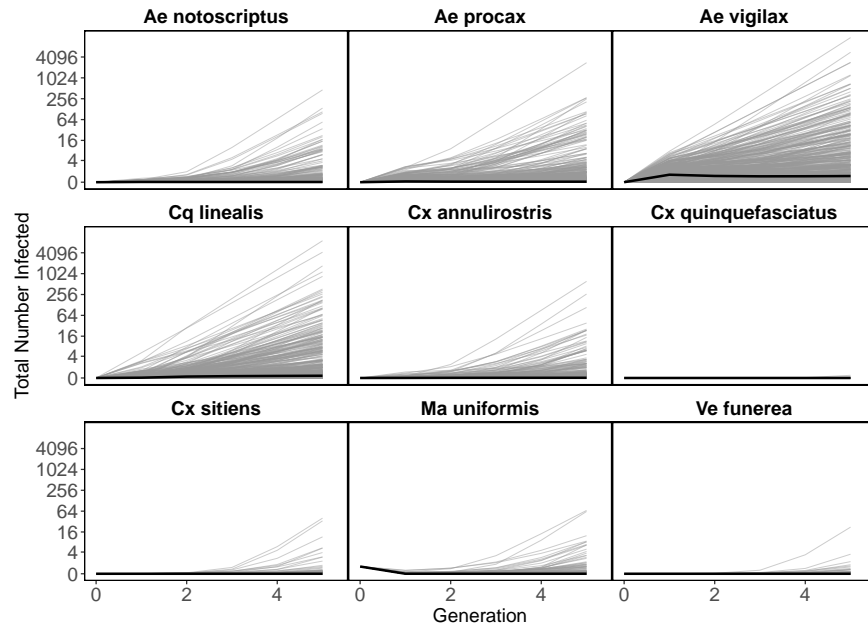

Figure S<sub>r</sub>5: **An initial *Ma. uniformis* infection propagates through the mosquito community.** Starting with a single infected *Ma. uniformis* in generation “zero”, the next generation matrix approach approximates the number of mosquitoes infected in subsequent generations. All generation one mosquito infections arise from the source *Ma. uniformis* infecting hosts and those hosts infecting mosquitoes; the plotted number of infections for each mosquito species is the estimated total number of infections in that species arising from all transmission pathways. As these results are generated from the same model that produced the results in Figure S<sub>r</sub>4 (simply with a different perspective) median estimates (bold black line) show slightly increasing numbers of infections in mosquitoes over generations. However, large uncertainty for the number of infections produced by each infected host and mosquito (see Figure 2, Figure 3) results in the possibility of explosive epidemics and thousands of infected individual mosquitoes after a few generations. As in Figure S<sub>r</sub>4, the thin grey black lines are 500 epidemic realizations. Because we assume a fully susceptible host and vector population, this is an epidemic simulation, which would over-estimate the amount of RRV transmission in Brisbane because of the high host immunity in the host population that is ignored here.

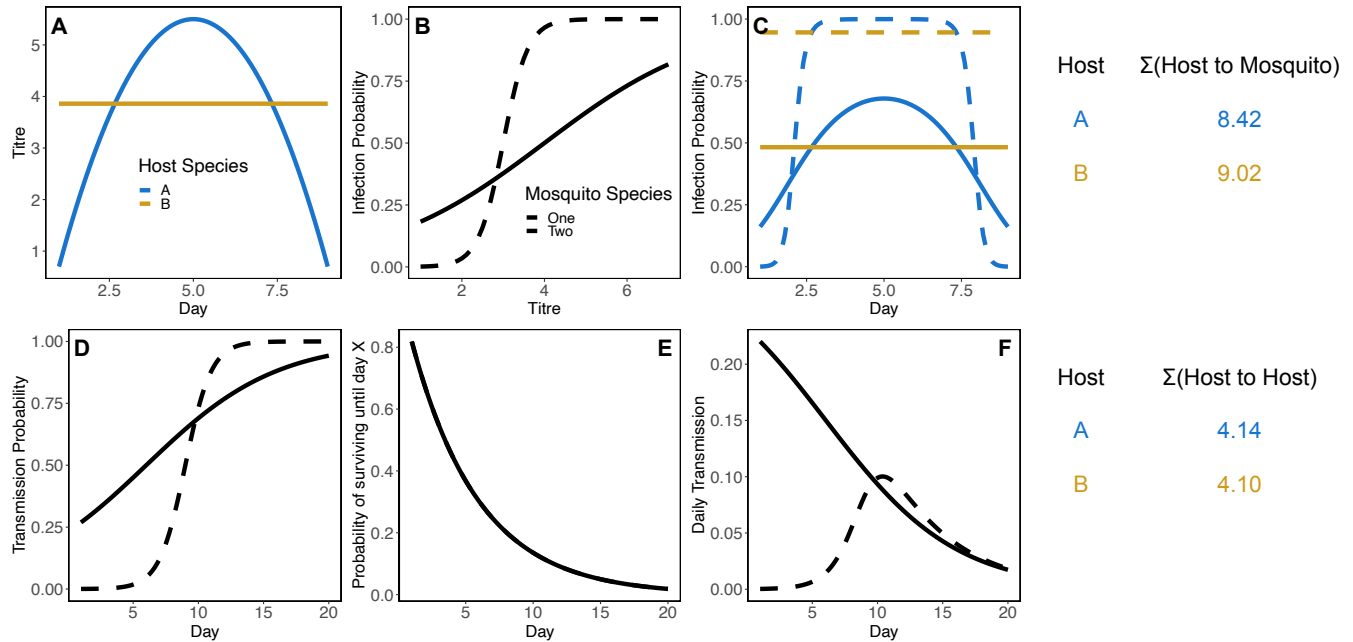

Figure S<sub>r</sub>6: Simulated illustrative example for how host species can change rank between host-to-mosquito (panels A-C) and host to host (panels D-F) definitions of competence, even without considering host abundance, mosquito abundance, mosquito biting preference, or differences in mosquito survival (each of these variables makes increases the possible routes to host rank reversal). In this example, host species A has a more peaked titer curve than host species B (panel A). Here, when each of these host species are bit by two different mosquito species with different infection probability curves (panel B), host species B has an overall higher probability of infecting these two mosquitoes (panel C). To the right of the top panel shows the total number of mosquitoes infected over the course of 8 days of infection in these two host species, assuming 5 susceptible mosquitoes of each species per host and a daily biting rate of 0.4 for each mosquito species. When these mosquito species differ in their incubation rate and thus transmission probability (panel D), and the same survival probability (differential survival makes the reversal of ranks easier – if mosquito species 2 has lower survival the gap between host species will widen) even if they have the same survival probability (panel E), they will have different survival-weighted transmission rates per bite over time (panel F). Taking the total number of infected mosquitoes of each species in the host to mosquito infection step and multiplying by the total number of transmissions over the mosquitoes lifetime, considering mosquito biting rate, results in host species A producing a fraction more host to host infections than species B.

## Supplemental Tables: Previous Research

Table S1: **Previous research on host and vector importance** has identified a large variety of physiological and ecological components to define what makes a reservoir host or competent vector; here we provide a non-exhaustive sampling of the variability in which components are used in individual metrics in published literature. Importantly, all of these works identify key hosts and vectors using but a small subset of the physiological and ecological components identified collectively.

| Reference                                                                    | Reservoir or vector | Physiological                                     |                                          |                                              |                                                  | Ecological                |           |                          |                   |                   |
|------------------------------------------------------------------------------|---------------------|---------------------------------------------------|------------------------------------------|----------------------------------------------|--------------------------------------------------|---------------------------|-----------|--------------------------|-------------------|-------------------|
|                                                                              |                     | Pathogen load (e.g. titre duration and magnitude) | Pathogen isolated (e.g. virus isolation) | Immune response (e.g. detectable antibodies) | Survival (i.e. survives long enough to transmit) | Population susceptibility | Abundance | Contact with vector/host | Breeding patterns | Activity patterns |
| DeFoliart et al. 1987                                                        | Reservoir           |                                                   | X                                        |                                              |                                                  | X                         | X         | X                        | X                 |                   |
| Levin et al. 2002                                                            | Reservoir           | X                                                 | X                                        | X                                            |                                                  | X                         |           |                          |                   |                   |
| Ashford 1997                                                                 | Reservoir           | X                                                 |                                          | X                                            |                                                  | X                         |           | X                        |                   |                   |
| Haydon et al. 2002                                                           | Reservoir           |                                                   |                                          | X                                            |                                                  | X                         | X         | X                        |                   |                   |
| Kuno et al. 2017                                                             | Reservoir           | X                                                 | X                                        | X                                            |                                                  | X                         |           |                          |                   |                   |
| (Cleaveland and Dye, 1995)                                                   | Reservoir           | X                                                 |                                          | X                                            |                                                  | X                         |           |                          |                   |                   |
| Silva et al. 2005                                                            | Reservoir           | X                                                 |                                          |                                              | X                                                | X                         |           | X                        |                   |                   |
| WHO Scientific Group on Arthropod-Borne and Rodent-Borne Viral Diseases 1985 | Reservoir           | X                                                 |                                          | X                                            | X                                                | X                         |           |                          | X                 |                   |
| Scott 1988                                                                   | Reservoir           | X                                                 |                                          | X                                            | X                                                |                           |           | X                        |                   |                   |
| Wilson et al. 2017                                                           | Vector              |                                                   |                                          |                                              |                                                  |                           |           |                          |                   |                   |
| DeFoliart et al. 1987                                                        | Vector              | X                                                 | X                                        |                                              |                                                  |                           |           | X                        |                   |                   |
| Kahl et al. 2002                                                             | Vector              | X                                                 |                                          |                                              | X                                                |                           |           | X                        |                   |                   |
| Killick-Kendrick 1990                                                        | Vector              | X                                                 | X                                        |                                              |                                                  |                           | X         | X                        |                   | X                 |
| Beier 2002                                                                   | Vector              |                                                   |                                          |                                              |                                                  |                           |           |                          |                   |                   |
| WHO Scientific Group on Arthropod-Borne and Rodent-Borne Viral Diseases 1985 | Vector              | X                                                 | X                                        |                                              |                                                  |                           |           | X                        |                   |                   |
| Kuno and Chang 2005                                                          | Vector              |                                                   |                                          |                                              |                                                  |                           |           |                          |                   |                   |

## Supplemental Tables: Brisbane Community

Table S2: **Proportion of all exposed hosts that developed detectable viremia.** For all non-human hosts 'Number Infected' gives the total number of experimentally exposed individuals and 'Number Viremic' gives the number of these exposed hosts that developed a viremic response. For humans, 'Number Infected' gives the sum of naturally infected humans tested sometime between the first day of symptom onset and 7 days post symptom onset, while 'Number Viremic' gives the proportion of these individual:day samples with detectable viremia. For details on the aggregation of host species see main text *Methods: Tailoring the model to the Brisbane community*

| Species    | Number Infected | Number Viremic | Reference                                              |
|------------|-----------------|----------------|--------------------------------------------------------|
| Human      | 102             | 49             | <a href="#">Rosen et al. 1981</a>                      |
| Dog        | 10              | 0              | <a href="#">Boyd and Kay 2002</a>                      |
| Cat        | 10              | 0              | <a href="#">Boyd and Kay 2002</a>                      |
| Bird       | 51              | 30             | <a href="#">Whitehead 1969, Kay et al. 1986</a>        |
| Possum     | 10              | 3              | <a href="#">Boyd et al. 2001</a>                       |
| Flying fox | 10              | 3              | <a href="#">Ryan et al. 1997</a>                       |
| Cattle     | 6               | 1              | <a href="#">Kay et al. 1986</a>                        |
| Horse      | 11              | 1              | <a href="#">Kay et al. 1986</a>                        |
| Macropod   | 12              | 10             | <a href="#">Whitehead 1969, Kay et al. 1986</a>        |
| Rat        | 4               | 4              | <a href="#">Whitehead 1969</a>                         |
| Sheep      | 22              | 17             | <a href="#">Spradbrow et al. 1973, Kay et al. 1986</a> |
| Rabbit     | 13              | 10             | <a href="#">Whitehead 1969, Kay et al. 1986</a>        |

Table S3: **Relative proportion of each mosquito species that make up the Brisbane mosquito community as used in our analysis..** The nine mosquito species for which we had both abundance data and blood meal data, which together make up 90% of total sampled Brisbane mosquito community.

| Species                     | Percentage |
|-----------------------------|------------|
| <i>Cx. annulirostris</i>    | 38.40      |
| <i>Ae. vigilax</i>          | 25.20      |
| <i>Ae. procax</i>           | 21.60      |
| <i>Cq. linealis</i>         | 11.00      |
| <i>Ae. notoscriptus</i>     | 2.66       |
| <i>Cx. sitiens</i>          | 0.647      |
| <i>Ma. uniformis</i>        | 0.266      |
| <i>Ve. funerea</i>          | 0.108      |
| <i>Cx. quinquefasciatus</i> | 0.141      |

Table S4: **Brisbane host community seroprevalence estimates.** For details on the aggregation of host species see main text *Methods: Tailoring the model to the Brisbane community*

| Species    | Proportion Seropositive | Reference                            |
|------------|-------------------------|--------------------------------------|
| Human      | 0.138                   | <a href="#">Faddy et al. 2015</a>    |
| Dog        | 0.237                   | <a href="#">Boyd and Kay 2002</a>    |
| Cat        | 0.140                   | <a href="#">Boyd and Kay 2002</a>    |
| Bird       | 0.289                   | <a href="#">Skinner et al. 2020</a>  |
| Possum     | 0.538                   | <a href="#">Skinner et al. 2020</a>  |
| Flying fox | 0.172                   | <a href="#">Skinner et al. 2020</a>  |
| Cattle     | 0.360                   | <a href="#">Vale et al. 1991</a>     |
| Horse      | 0.939                   | <a href="#">Skinner et al. 2020</a>  |
| Macropod   | 0.345                   | <a href="#">Skinner et al. 2020</a>  |
| Rat        | 0.020                   | <a href="#">Doherty et al. 1966</a>  |
| Sheep      | 0.110                   | <a href="#">Doherty et al. 1966</a>  |
| Rabbit     | 0.000                   | <a href="#">Marshall et al. 1980</a> |

Table S5: **Relative proportion of each host species that make up the Brisbane host community as used in our analysis.** For details on the aggregation of host species see main text *Methods: Tailoring the model to the Brisbane community*. Data from [Skinner et al. \(2020\)](#).

| Species    | Percentage |
|------------|------------|
| Human      | 66.003     |
| Dog        | 13.488     |
| Cat        | 9.911      |
| Bird       | 5.287      |
| Possum     | 1.585      |
| Flying fox | 1.367      |
| Cattle     | 0.931      |
| Horse      | 0.873      |
| Macropod   | 0.498      |
| Rat        | 0.027      |
| Sheep      | 0.021      |
| Rabbit     | 0.008      |
